# Supplementary material for: Randomised controlled trial of vitamin D supplementation in sarcoidosis
Source: PubMed Central journal article supplement — BMJ Open. 2013 Oct 23;3(10):e003562. doi: 10.1136/bmjopen-2013-003562 (PMC3808783; doi:10.1136/bmjopen-2013-003562), 2013-10-23
Supplement: bmjopen-2013-003562.draft_revisions.pdf [file bmjopen-2013-003562.draft_revisions.pdf]

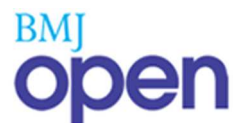

## Randomized controlled trial of vitamin D supplementation in sarcoidosis

|                                 |                                                                                                                                                                                                                                                                                                                                                                                                                                                                         |
|---------------------------------|-------------------------------------------------------------------------------------------------------------------------------------------------------------------------------------------------------------------------------------------------------------------------------------------------------------------------------------------------------------------------------------------------------------------------------------------------------------------------|
| Journal:                        | <i>BMJ Open</i>                                                                                                                                                                                                                                                                                                                                                                                                                                                         |
| Manuscript ID:                  | bmjopen-2013-003562                                                                                                                                                                                                                                                                                                                                                                                                                                                     |
| Article Type:                   | Research                                                                                                                                                                                                                                                                                                                                                                                                                                                                |
| Date Submitted by the Author:   | 08-Jul-2013                                                                                                                                                                                                                                                                                                                                                                                                                                                             |
| Complete List of Authors:       | Bolland, Mark; University of Auckland, Department of Medicine<br>Wilsher, Margaret; Auckland District Health Board, Respiratory Services<br>Grey, Andrew; University of Auckland, Department of Medicine<br>Horne, Anne; University of Auckland, Department of Medicine<br>Fenwick, Sheryl; University of Auckland, Department of Medicine<br>Gamble, Greg; University of Auckland, Department of Medicine<br>Reid, Ian; University of Auckland, Department of Medicine |
| <b>Primary Subject Heading</b>: | Respiratory medicine                                                                                                                                                                                                                                                                                                                                                                                                                                                    |
| Secondary Subject Heading:      | Diabetes and endocrinology                                                                                                                                                                                                                                                                                                                                                                                                                                              |
| Keywords:                       | THORACIC MEDICINE, Clinical trials < THERAPEUTICS, Calcium & bone < DIABETES & ENDOCRINOLOGY                                                                                                                                                                                                                                                                                                                                                                            |
|                                 |                                                                                                                                                                                                                                                                                                                                                                                                                                                                         |

SCHOLARONE™  
Manuscripts

**Title:** Randomized controlled trial of vitamin D supplementation in sarcoidosis.

**Running title:** Vitamin D supplementation and sarcoidosis

**Authors:**

Mark J Bolland, MBChB, PhD,<sup>1</sup>  
Margaret L Wilsher, MD,<sup>1,2</sup>  
Andrew Grey, MD,<sup>1</sup>  
Anne M Horne, MBChB,<sup>1</sup>  
Sheryl Fenwick, BAppSc<sup>1</sup>  
Greg D Gamble, MSc<sup>1</sup>  
Ian R Reid, MD,<sup>1</sup>

**Affiliation:**

<sup>1</sup>Department of Medicine, University of Auckland, Private Bag 92 019, Auckland 1142, New Zealand; <sup>2</sup> Green Lane Respiratory Services, Auckland District Health Board, Private Bag 92024, Auckland 1142, New Zealand

**Address for correspondence/reprints:**

Mark Bolland  
Bone and Joint Research Group,  
Department of Medicine, University of Auckland  
Private Bag 92 019, Auckland 1142, New Zealand  
Email: [m.bolland@auckland.ac.nz](mailto:m.bolland@auckland.ac.nz)  
Ph 64 9 373 7999  
Fax 64 9 373 7677

**Funding:**

This study was funded by the Health Research Council of New Zealand, and the Greenlane Research and Education Fund.

**Word counts:**

Text only: 2326  
Abstract: 248  
Figures: 5  
Tables: 2

**Disclosure:** All the authors state that they have no conflicts of interest.

**Key words:** vitamin D, hypercalcaemia, sarcoidosis, bone turnover, bone mineral density

**Trial registration:** This trial is registered at the Australian New Zealand Clinical Trials Registry ([www.anzctr.org.au](http://www.anzctr.org.au)). The registration number is ACTRN12607000364471, date of registration 5/7/2007.

**Article focus:**

- The effect of vitamin D supplementation on calcium homeostasis and skeletal health in sarcoidosis
- A randomized, placebo-controlled trial of vitamin D supplements in 27 patients with sarcoidosis and 25-hydroxyvitamin D <50nmol/L

**Key messages:**

- Vitamin D supplementation had no effect on serum or urine calcium, bone turnover markers or bone mineral density over 12 months, but caused 1 case of significant hypercalcaemia.
- This clinical trial suggests that vitamin D supplements are not beneficial and may be harmful for patients with sarcoidosis and mildly low vitamin D levels.

**Limitations:**

- The study had limited power to detect small differences in bone density and bone turnover markers.
- Few participants had 25-hydroxyvitamin D levels < 25 nmol/L, and therefore the findings may not apply to individuals with very low vitamin D levels.

**Abstract****Background**

The role vitamin D intake/production plays in sarcoidosis-associated hypercalcaemia is uncertain. However, authoritative reviews have recommended avoiding sunlight exposure and vitamin D supplements, which might lead to adverse skeletal outcomes from vitamin D insufficiency.

**Methods**

We undertook a 1y randomized, placebo-controlled trial of vitamin D supplements (50,000IU weekly cholecalciferol for 4 weeks, then 50,000IU monthly for 11 months) in 27 patients with sarcoidosis and 25-hydroxyvitamin D (25OHD) <50nmol/L. The primary endpoint was the change in serum calcium over 12 months, and secondary endpoints included measurements of calcitropic hormones, bone turnover markers, and bone mineral density (BMD).

**Results**

The mean age of participants was 57y and 70% were female. The mean (SD) screening 25OHD was 35(12) and 38(9) nmol/L in the treatment and control groups, respectively. Vitamin D supplementation increased 25OHD to 94 nmol/L after 4 weeks, 84 nmol/L at 6 months, and 78 nmol/L at 12 months, while levels remained stable in the control group. 1,25 dihydroxyvitamin D levels were significantly different between the groups at 4 weeks, but not at 6 or 12 months. There were no between-groups differences in albumin-adjusted serum calcium, 24h urine calcium, markers of bone turnover, parathyroid hormone, or BMD over the trial. One participant developed significant hypercalcaemia after 6 weeks (total cholecalciferol dose 250,000IU).

### Conclusions

In patients with sarcoidosis and 25OHD <50nmol/L, vitamin D supplements did not alter average serum calcium or urine calcium, but had no benefit on surrogate markers of skeletal health and caused one case of significant hypercalcaemia.

For peer review only

**Introduction:**

Hypercalcaemia occurs commonly in sarcoidosis, with an estimated prevalence of 4-11%. [1,2] Hypercalcaemia results from dysregulated production of 1,25-dihydroxyvitamin D (1,25OHD) by activated macrophages in granulomata. [3] Although the mechanism of hypercalcaemia is known, the role of vitamin D intake and production is less certain. On one hand, cases of hypercalcaemia and sarcoidosis precipitated by sunlight exposure or vitamin D supplements have been reported, [4-8] and there is seasonal variation in 1,25OHD levels [9] and the prevalence of hypercalcaemia. [7, 9, 10] These findings suggest that increases in 25-hydroxyvitamin D (25OHD) levels through sunlight exposure or vitamin D intake contribute to the hypercalcaemia. On the other hand, studies have reported no correlation between 25OHD, 1,25OHD, and serum calcium, [11] historical studies of treatment with very large doses of vitamin D (target 100,000 IU/d for 5-212 days) produced hypercalcaemia in only 4/24 patients, [12] and patients with sarcoidosis and glucocorticoid-induced osteoporosis commonly take vitamin D supplements without developing hypercalcaemia. [13] Furthermore, countries at higher latitudes do not have consistently lower prevalence of hypercalcaemia than countries closer to the equator, [1] and prevalence of hypercalcaemia is similar in countries with and without dietary vitamin D fortification. [6] These findings suggest that vitamin D intake and production are not the sole causes of hypercalcaemia in sarcoidosis.

Despite the conflicting evidence over the role of vitamin D intake/production in sarcoidosis-associated hypercalcaemia, several authoritative reviews have recommended avoidance of sunlight exposure and vitamin D supplements. [6-8] Adopting such recommendations is likely to lead to vitamin D insufficiency, which is associated with a number of adverse skeletal outcomes including secondary hyperparathyroidism, increased bone turnover, low bone mineral density (BMD) and increased risk of fracture. [14] There is a high prevalence of low

1  
2  
3 BMD in cross-sectional studies of patients with sarcoidosis,[7 ,13 ,15-18] and glucocorticoid  
4  
5 use is common and well known to have adverse skeletal effects. Thus, it is possible that  
6  
7 treatment recommendations of sarcoidosis may worsen skeletal health by inadvertently  
8  
9 promoting vitamin D insufficiency.  
10

11  
12  
13  
14 There has been recent interest in the effects of vitamin D supplements in patients with  
15  
16 sarcoidosis.[19-22] We have carried out a randomized controlled trial to determine the effects  
17  
18 of vitamin D supplementation in patients with sarcoidosis and vitamin D insufficiency.  
19  
20

## 21 22 23 **Methods:**

### 24 25 Participants:

26  
27 Patients with sarcoidosis attending the interstitial lung disease clinic at our hospital were invited  
28  
29 to participate. Newspaper advertisements were also placed. Potential participants were eligible if  
30  
31 they had sarcoidosis diagnosed by biopsy and/or typical pattern on high resolution computed  
32  
33 tomography and screening 25OHD <50 nmol/L, but were excluded if they had serum creatinine  
34  
35 >150 umol/L, nephrocalcinosis, albumin-adjusted serum calcium >2.55 mmol/L, concurrent  
36  
37 major systemic illness, or BMD T score <-2.5 at the spine or hip. Participants were recruited  
38  
39 between September 2007 and December 2010. The flow of participants is shown in Figure 1.  
40  
41  
42  
43  
44

### 45 46 Protocol

47  
48 Participants were randomized to receive either 50,000 IU of cholecalciferol or placebo weekly  
49  
50 for four weeks followed by 50,000 IU cholecalciferol or placebo every month for 11 months.  
51  
52 Patients were asked to continue their usual diet to maintain their dietary calcium intake in  
53  
54 accordance with locally recommended practice. Calcium supplements were not administered.  
55  
56 Treatment allocations were randomized by the study statistician, using a variable block size  
57  
58  
59  
60

1  
2  
3 schedule, based on computer-generated random numbers. Study medication was dispensed into  
4  
5 identical bottles and labelled with participant numbers by a staff member not otherwise involved  
6  
7 in the study. To ensure masking, only the statistician and this staff member had access to  
8  
9 treatment allocation, and neither had contact with participants. All other study personnel and  
10  
11 participants were blinded to treatment allocation throughout. The study received ethical  
12  
13 approval from the Northern X regional ethics committee and the trial was registered with the  
14  
15 Australian New Zealand Clinical Trials Registry, ACTRN12607000364471. All participants  
16  
17 gave written, informed consent.  
18  
19

20  
21  
22 The primary endpoint was the change in serum calcium over 12 months with vitamin D  
23  
24 supplementation. Secondary endpoints were the change in urine calcium, change in markers of  
25  
26 bone turnover, and change in BMD over 12 months. It was planned to recruit 40 participants, for  
27  
28 which the study had >80% power ( $\alpha = 0.05$ ) to detect a difference in serum calcium of 0.10  
29  
30 mmol/L between groups. Recruitment was stopped after more than 3y when 27 participants were  
31  
32 recruited.  
33  
34  
35

### 36 37 38 Measurements:

39  
40 At baseline, every 2 weeks for 8 weeks, then at 12, 16, 26, 39, and 52 weeks, fasting blood  
41  
42 and second-voided morning urine samples were collected. Samples for calcitropic hormones  
43  
44 and bone turnover markers were stored at  $-70^{\circ}\text{C}$  until they were batch-analyzed. At baseline,  
45  
46 4, 26, and 52 weeks, 24h urine samples were collected. The following assays were used: the  
47  
48 screening 25OHD was measured by radioimmunoassay (RIA) (DiaSorin, Stillwater, MN), but  
49  
50 all 25OHD samples from the study including the baseline sample were measured by liquid  
51  
52 chromatography- tandem mass spectrometry (LC-MS/MS) (ABSciex API 4000); 1,25OHD  
53  
54 by RIA (IDS, Tyne and Wear, UK), serum parathyroid hormone (PTH) by  
55  
56  
57  
58



1  
2  
3 electrochemiluminescence immunoassay (E170, Roche Diagnostics, Indianapolis, IN); serum  
4  
5 procollagen type-I N-terminal propeptide (PINP) and serum  $\beta$ -C-terminal telopeptide of type I  
6  
7 collagen (CTX) by the Roche Elecsys 2010 platform (Roche Diagnostics, Indianapolis, IN).

8  
9  
10 BMD was measured every 6 months at the lumbar spine, proximal femur and total body using a  
11  
12 GE Prodigy dual-energy x-ray absorptiometer (DXA) (GE Lunar, Madison WI). Daily calcium  
13  
14 intake was assessed at baseline using a validated questionnaire.[23]

### 15 16 17 18 Statistics:

19  
20 Baseline differences between groups for continuous variables were assessed using Student's t-  
21  
22 test, and for categorical variables using the Chi-Square test. All analyses were carried out on an  
23  
24 intention-to-treat basis. A mixed models approach to repeated measures was used to examine the  
25  
26 time course of response in the treatment and control arms for serum calcium, urine calcium,  
27  
28 calcitropic hormones, bone turnover markers and BMD measurements by fitting main and  
29  
30 treatment-by-time interaction effects. Post-hoc comparisons between groups at individual time  
31  
32 points were explored using the method of Tukey. BMD data were analyzed using raw data,  
33  
34 although results are presented as percentage change from baseline adjusted for baseline between-  
35  
36 groups differences, for ease of interpretation. All tests were two-tailed and statistical significance  
37  
38 was set at  $P < 0.05$ . All statistical analyses were carried out using the SAS software package (SAS  
39  
40 Institute, Cary, NC version 9.2)

### 41 42 43 44 **Results:**

45  
46  
47 The baseline characteristics of the two groups were similar (Table 1).  
48  
49  
50  
51  
52  
53  
54  
55  
56  
57  
58  
59  
60

Table 1: Baseline characteristics

|                                    | Vitamin D<br>n=13 | Placebo<br>n=14 | P    |
|------------------------------------|-------------------|-----------------|------|
| Age (y)                            | 56 (10)           | 57 (9)          | 0.7  |
| Female                             | 10 (77)           | 9 (64)          | 0.7  |
| Ethnicity                          |                   |                 |      |
| European                           | 10 (77)           | 9 (64)          | 0.7  |
| Indian                             | 1 (8)             | 3 (21)          |      |
| Other                              | 1 (8)             | 2 (14)          |      |
| Weight (kg)                        | 75 (19)           | 72 (13)         | 0.7  |
| Dietary calcium intake (mg/d)      | 730 (670)         | 660 (33)        | 0.7  |
| Smoking status                     |                   |                 |      |
| Current                            | 3 (23)            | 0 (0)           | 0.1  |
| Never Smoked                       | 8 (63)            | 9 (64)          | >0.9 |
| Glucorticoid use                   |                   |                 |      |
| Past oral use                      | 7 (54)            | 9 (64)          | 0.6  |
| Current oral use                   | 1 (8)             | 0 (0)           | 0.5  |
| Current inhaled use                | 6 (46)            | 1 (7)           | 0.03 |
| Sarcoidosis extent                 |                   |                 |      |
| Pulmonary involvement              | 11 (85)           | 8 (57)          | 0.2  |
| Extra-pulmonary involvement        | 6 (46)            | 7 (50)          | 0.8  |
| Chest radiograph stage at baseline |                   |                 | 0.3  |
| Stage 0                            | 1 (10)            | 6 (46)          |      |
| Stage 1                            | 1 (10)            | 1 (8)           |      |
| Stage 2                            | 1 (10)            | 0 (0)           |      |
| Stage 3                            | 3 (30)            | 4 (31)          |      |
| Stage 4                            | 4 (40)            | 2 (15)          |      |
| Bone density (g/cm <sup>2</sup> )  |                   |                 |      |
| Lumbar spine                       | 1.16 (0.19)       | 1.13 (0.11)     | 0.5  |
| T score                            | -0.2 (1.6)        | -0.6 (0.9)      | 0.5  |
| Total hip                          | 0.95 (0.11)       | 0.93 (0.11)     | 0.7  |
| T score                            | -0.6 (0.9)        | -0.8 (0.9)      | 0.8  |
| Femoral neck                       | 0.89 (0.13)       | 0.91 (0.09)     | 0.6  |
| T score                            | -1.2 (1.0)        | -0.9 (0.7)      | 0.5  |
| Total body                         | 1.15 (0.10)       | 1.11 (0.07)     | 0.2  |
| Adjusted serum calcium (mmol/L)    | 2.24 (0.06)       | 2.26 (0.12)     | 0.6  |
| Serum phosphate (mmol/L)           | 1.23 (0.15)       | 1.06 (0.17)     | 0.01 |
| Serum creatinine (mmol/L)          | 74 (14)           | 77 (12)         | 0.5  |
| 24 hr urine calcium (mmol/d)       | 4.6 (3.4)         | 6.6 (5.2)       | 0.3  |

|                                                    |           |           |      |
|----------------------------------------------------|-----------|-----------|------|
| Screening 25 hydroxyvitamin D (nmol/) <sup>a</sup> | 35 (12)   | 38 (9)    | 0.5  |
| Baseline 25 hydroxyvitamin D (nmol/) <sup>a</sup>  | 40 (17)   | 45 (17)   | 0.4  |
| 1,25 dihydroxyvitamin D (pmol/L)                   | 109 (34)  | 116 (25)  | 0.5  |
| Parathyroid hormone (pmol/L)                       | 4.0 (1.6) | 4.9 (2.0) | 0.2  |
| P1NP (ug/L)                                        | 37 (12)   | 40 (15)   | 0.6  |
| β-CTX (ng/L)                                       | 310 (130) | 360 (210) | 0.45 |

<sup>a</sup> 25-hydroxyvitamin D were measured at the screening study visit using a Diasorin assay, while the baseline 25-hydroxyvitamin D at the first study visit (average 3 weeks later) were stored frozen until the end of the study and then measured with a liquid chromatography tandem mass spectrometry assay (see text). Data are mean (SD) or n (%). Abbreviations: P1NP- serum procollagen type-I N-terminal propeptide; β-CTX - serum β-C-terminal telopeptide of type I collagen.

The mean (range) 25OHD at the study screening visit was 35 (14-48) nmol/L in the treatment group, and 38 (12-49) nmol/L in the controls. The baseline 25OHD measurements from the first study visit (average 3 weeks after screening 25OHD) that were stored and then measured at the end of the study using a different assay were slightly higher than the screening 25OHD in both groups (Table 1). Vitamin D supplementation led to an immediate increase in 25OHD levels, and a sustained difference between the groups that persisted throughout the trial (P<0.001) (Figure 1). There was also an immediate increase in 1,25OHD levels in response to vitamin D supplementation, but this did not persist. While the between-groups differences over the trial were statistically significant (P=0.007), by the end of the trial 1,25OHD levels were similar in both groups (Figure 2).

1  
2  
3 Figure 3 shows that vitamin D supplements had no effect on either average albumin-adjusted  
4 serum calcium ( $P=0.46$ ) or 24h urine calcium levels ( $P=0.10$ ) throughout the trial. There were no  
5  
6 between-group differences at any time point in participants with 24h urine calcium  $> 10$   
7  
8 mmol/day (baseline vitamin D vs control- 1 vs. 4; 4 weeks- 4 vs. 4; 16 weeks 1 vs. 2; 52 weeks –  
9  
10 3 vs. 2). One participant in the vitamin D group and none in the control group had sustained  
11  
12 hypercalcaemia with 24h urine calcium  $> 10$  mmol/day in all 3 visits during follow-up. One  
13  
14 participant developed hypercalcaemia during the trial- a 51y old female, diagnosed with  
15  
16 sarcoidosis 2y prior to study entry, with bilateral hilar lymphadenopathy, liver, and lung  
17  
18 involvement. She was taking inhaled glucocorticoids at study entry but no other medication. She  
19  
20 was assigned to vitamin D treatment and Table 2 shows that hypercalcaemia was recognized at 6  
21  
22 weeks, by which time she had taken five 50,000 IU doses of cholecalciferol. She was vitamin D  
23  
24 deficient at baseline, and treatment increased her 25OHD level to 69 nmol/L. There was a  
25  
26 marked increase in 1,25OHD, 24h urine calcium, serum phosphate, and creatinine levels and  
27  
28 suppression of PTH levels following vitamin D supplementation, but she remained  
29  
30 asymptomatic throughout. No further study medication was taken and the biochemical  
31  
32 abnormalities resolved without specific treatment by week 16 of the trial. When this participant  
33  
34 was excluded from the analyses for serum calcium and 24h urine calcium, the results did not  
35  
36 change substantially except there was no visible rise in the average albumin-adjusted serum  
37  
38 calcium at 6 and 8 weeks in the vitamin D group (data not shown).  
39  
40  
41  
42  
43  
44  
45  
46  
47  
48  
49  
50  
51  
52  
53  
54  
55  
56  
57  
58  
59  
60

Table 2: Time course of hypercalcaemia in patient randomized to vitamin D supplements

| Week <sup>a</sup> | Dietary calcium (mg/d) | Serum calcium <sup>b</sup> (mmol/L) | Serum phosphate (mmol/L) | Serum creatinine (μmol/L) | 24h urine calcium (mmol/d) | 25OHD (nmol/L) | 1,25OHD (pmol/L) | PTH (pmol/L) |
|-------------------|------------------------|-------------------------------------|--------------------------|---------------------------|----------------------------|----------------|------------------|--------------|
| 0                 | 460                    | 2.26                                | 1.24                     | 76                        | 4.2                        | 18             | 77               | 2.3          |
| 2                 |                        | 2.36                                | 1.28                     | 74                        |                            |                |                  |              |
| 4                 |                        | 2.48                                | 1.57                     | 83                        | 14.4                       | 69             | 218              | 0.9          |
| 6                 |                        | 2.88                                | 1.55                     | 112                       |                            |                |                  |              |
| 7                 |                        | 2.87                                | 1.31                     | 125                       |                            |                |                  |              |
| 8                 |                        | 2.65                                | 1.45                     | 124                       |                            |                |                  |              |
| 12                |                        | 2.46                                | 1.23                     | 93                        |                            |                |                  |              |
| 16                |                        | 2.22                                | 1.14                     | 75                        |                            |                |                  |              |
| 26                |                        | 2.28                                | 1.04                     | 71                        |                            | 31             | 81               | 2.2          |
| 52                |                        | 2.27                                | 1.11                     | 78                        | 6.7                        | 41             | 77               | 2.1          |

<sup>a</sup> study treatment was stopped at 6 weeks when hypercalcaemia was recognised. The last dose was taken at week 5, and five 50,000 IU doses of cholecalciferol were taken over 5 weeks.

<sup>b</sup> albumin-adjusted serum calcium.

Abbreviations : 25OHD 25-hydroxyvitamin D, 1,25OHD 1,25-dihydroxyvitamin D, PTH-parathyroid hormone.

The effect of vitamin D supplements on bone turnover markers and PTH are shown in Figure 4 and on BMD in Figure 5. Vitamin D supplementation had no effect on any of these variables ( $P > 0.16$  for all variables).

Other than the 1 participant treated with vitamin D who developed hypercalcaemia (proportion 8%, 95% confidence interval 1-33%), there were no other adverse events potentially related to

1  
2  
3 treatment during the trial. 1 participant (randomized to vitamin D) required prolonged treatment  
4  
5 with oral glucocorticoids, and 1 participant (randomized to placebo) received a single infusion of  
6  
7 zoledronic acid at 11 months, because of an underlying neurological disorder that had led to an  
8  
9 increased risk of falls and fracture.  
10

### 11 12 13 14 **Discussion:**

15  
16 Vitamin D supplementation of patients with sarcoidosis and vitamin D insufficiency did not alter  
17  
18 average serum calcium or urine calcium levels, but also did not affect BMD or markers of bone  
19  
20 turnover, and caused one case of significant hypercalcaemia. 25OHD levels were in a range  
21  
22 many experts consider sub-optimal at baseline (average <50 nmol/L) and vitamin D  
23  
24 supplementation led to average 25OHD levels of >75nmol/L throughout the trial, levels  
25  
26 generally considered to indicate adequate vitamin D status. Thus, our findings of an absence of  
27  
28 benefit from vitamin D supplements, together with infrequent but significant hypercalcaemia,  
29  
30 suggest that there is little indication for vitamin D supplements in patients with sarcoidosis and  
31  
32 vitamin D insufficiency.  
33  
34  
35  
36  
37

38  
39 Recent research has linked low 25OHD levels with numerous adverse non-skeletal  
40  
41 outcomes.[24] This information, when added to the existing data linking low 25OHD levels with  
42  
43 adverse skeletal outcomes,[14] has lead to renewed interest in the role of vitamin D in health. In  
44  
45 clinical practice, there has been a large increase in measurement of 25OHD [25 ,26] and calls for  
46  
47 widespread vitamin D supplementation.[27] However, these associations between low vitamin D  
48  
49 status and adverse health outcomes have been generated from observational studies which  
50  
51 cannot determine causality. There are now a growing number of randomized controlled trials  
52  
53 that have not shown benefits from vitamin D supplements on a wide range of endpoints. Thus,  
54  
55 meta-analyses of such trials have shown no benefit of vitamin D supplementation (when used  
56  
57  
58  
59  
60

1  
2  
3 without co-administered calcium supplements) on falls,[28] fractures,[29] mortality,[30]  
4  
5 cardiovascular events,[30] and cancer.[31] In our study, which was powered to assess serum  
6  
7 calcium rather than BMD effects, we did not find evidence for benefit of vitamin D supplements  
8  
9 on surrogate markers of skeletal health in a group of patients with sarcoidosis who had mildly  
10  
11 low 25OHD levels, consistent with these findings.  
12  
13

14  
15  
16 The mechanism of hypercalcaemia in sarcoidosis is well described. Extra-renal production of  
17  
18 1,25OHD in activated macrophages in granulomata leads to increased intestinal calcium  
19  
20 absorption and increased bone resorption which collectively produce hypercalcaemia.[3] It is  
21  
22 unclear whether circulating 25OHD levels are implicated in causing hypercalcaemia, with some  
23  
24 evidence supporting [4-10] and some not supporting [1 ,6 ,11-13] each viewpoint, as discussed  
25  
26 earlier. Our study tends to support the former view for two reasons: firstly, one patient developed  
27  
28 significant hypercalcaemia within a short time of starting vitamin D supplements, and there was  
29  
30 prompt resolution of the hypercalcaemia without other treatment after the supplements were  
31  
32 stopped. Secondly, in the entire cohort there was a rapid increase in 1,25OHD with vitamin D  
33  
34 supplements, although the increase did not persist. Both pieces of data suggest that abrupt  
35  
36 changes in 25OHD can increase 1,25OHD, and in a minority of patients this can cause  
37  
38 hypercalcaemia. The characteristics that predispose to the development of hypercalcaemia  
39  
40 remain unclear. It is possible that increasing 25OHD more slowly using small, incrementally  
41  
42 increasing doses of vitamin D, may avoid this complication, but this would need to be tested in  
43  
44 closely monitored clinical trials.  
45  
46  
47  
48  
49  
50

51  
52 Our study has several limitations. It is a small study, but based on the data from the placebo  
53  
54 group, the study had 80% power to detect a difference between the groups of 0.1 mmol/L in the  
55  
56 primary endpoint- serum calcium. Similarly, the detectable differences for other variables were  
57  
58

1  
2  
3 BMD 2.2%-2.7% depending on site, PTH 1.5 pmol/L, P1NP 5.6 µg/L, and CTX 220 ng/L.  
4  
5 Differences below these amounts would be of questionable clinical relevance. Thus, while small,  
6  
7 the study did have power to detect clinically relevant differences. A second limitation is  
8  
9 regarding the screening vitamin D measurement. All participants had 25OHD <50 nmol/L at the  
10  
11 screening visit measured using a Diasorin RIA. All study samples for 25OHD were frozen and  
12  
13 then assayed in a single batch at another laboratory using an LC-MS/MS assay. The 25OHD  
14  
15 levels measured using LC-MS/MS were on average slightly higher than those measured using  
16  
17 the Diasorin immunoassay, and 9/27 participants had 25OHD > 50 nmol/L at the baseline visit.  
18  
19 Variation between results from different 25OHD assays is well-described, and while LC-MS/MS  
20  
21 is usually considered the gold standard, both immunoassays and LC-MS/MS have  
22  
23 limitations.[32] Few participants had 25OHD < 25 nmol at baseline, thus our results may not  
24  
25 apply to individuals with very low 25OHD levels.  
26  
27  
28  
29  
30  
31

32 In summary, we did not find evidence of benefits on surrogate markers of skeletal health from  
33  
34 vitamin D supplementation in patients with sarcoidosis and vitamin D insufficiency. However,  
35  
36 there was evidence of harm with one case of significant hypercalcaemia. The absence of benefit  
37  
38 together with the risk of infrequent but significant adverse effects suggests that there is little  
39  
40 indication for vitamin D supplements in patients with sarcoidosis and vitamin D levels in the  
41  
42 range in this study (12 – 49 nmol/L).  
43  
44  
45  
46  
47  
48  
49  
50  
51  
52  
53  
54  
55  
56  
57  
58  
59  
60



**Funding:**

This study was funded by the Health Research Council of New Zealand, and the Greenlane Research and Education Fund. The sponsors of the study had no role in design and conduct of the study; collection, management, analysis, and interpretation of the data; and preparation, review, or approval of the manuscript.

**Disclosure:** All the authors state that they have no conflicts of interest.

**Contributorship:**

MB, AG, AH, IR, and MW designed the study. SF and AH ran the study. MB and GG carried out the statistical analyses. MB drafted the article. All authors critically reviewed the draft manuscript and approved the final version. MB is the guarantor of the article.

**Data sharing:**

There are no additional data available.

## References

1. James DG, Neville E, Siltzbach LE. A worldwide review of sarcoidosis. *Ann N Y Acad Sci* 1976;**278**:321-34.
2. Baughman RP, Teirstein AS, Judson MA, Rossman MD, Yeager H, Jr., Bresnitz EA, et al. Clinical characteristics of patients in a case control study of sarcoidosis. *Am J Respir Crit Care Med* 2001;**164**:1885-9.
3. Singer FR, Adams JS. Abnormal calcium homeostasis in sarcoidosis. *N Engl J Med* 1986;**315**:755-7.
4. Bell NH, Gill JR, Jr., Bartter FC. On the Abnormal Calcium Absorption in Sarcoidosis. Evidence for Increased Sensitivity to Vitamin D. *Am J Med* 1964;**36**:500-13.
5. Sandler LM, Winearls CG, Fraher LJ, Clemens TL, Smith R, O'Riordan JL. Studies of the hypercalcaemia of sarcoidosis: effect of steroids and exogenous vitamin D3 on the circulating concentrations of 1,25-dihydroxy vitamin D3. *Q J Med* 1984;**53**:165-80.
6. Sharma OP. Vitamin D, calcium, and sarcoidosis. *Chest* 1996;**109**:535-9.
7. Rizzato G. Clinical impact of bone and calcium metabolism changes in sarcoidosis. *Thorax* 1998;**53**:425-9.
8. Conron M, Young C, Beynon HL. Calcium metabolism in sarcoidosis and its clinical implications. *Rheumatology (Oxford)* 2000;**39**:707-13.
9. Bonnema SJ, Moller J, Marving J, Kvetny J. Sarcoidosis causes abnormal seasonal variation in 1,25-dihydroxy-cholecalciferol. *J Intern Med* 1996;**239**:393-8.
10. Taylor RL, Lynch HJ, Jr., Wysor WG, Jr. Seasonal influence of sunlight on the hypercalcemia of sarcoidosis. *Am J Med* 1963;**34**:221-7.
11. Alberts C, van den Berg H. Calcium metabolism in sarcoidosis. A follow-up study with respect to parathyroid hormone and vitamin D metabolites. *Eur J Respir Dis* 1986;**68**:186-94.
12. Larsson LG, Liljestrang A, Wahlund H. Treatment of sarcoidosis with calciferol. *Acta Med Scand* 1952;**143**:281-87.
13. Adler RA, Funkhouser HL, Petkov VI, Berger MM. Glucocorticoid-induced osteoporosis in patients with sarcoidosis. *Am J Med Sci* 2003;**325**:1-6.
14. Lips P. Vitamin D deficiency and secondary hyperparathyroidism in the elderly: consequences for bone loss and fractures and therapeutic implications. *Endocr Rev* 2001;**22**:477-501.

15. Montemurro L, Fraioli P, Rizzato G. Bone loss in untreated longstanding sarcoidosis. *Sarcoidosis* 1991;**8**:29-34.
16. Rottoli P, Gonnelli S, Silitro S, Zacchei F, Fabbrini D, Gennari C, et al. Alterations in calcium metabolism and bone mineral density in relation to the activity of sarcoidosis. *Sarcoidosis* 1993;**10**:161-2.
17. Hamada K, Nagai S, Tsutsumi T, Izumi T. Bone mineral density and vitamin D in patients with sarcoidosis. *Sarcoidosis Vasc Diffuse Lung Dis* 1999;**16**:219-23.
18. Sipahi S, Tuzun S, Ozaras R, Calis HT, Ozaras N, Tuzun F, et al. Bone mineral density in women with sarcoidosis. *J Bone Miner Metab* 2004;**22**:48-52.
19. Burke RR, Rybicki BA, Rao DS. Calcium and vitamin D in sarcoidosis: how to assess and manage. *Semin Respir Crit Care Med* 2010;**31**:474-84.
20. Sharma OP. Vitamin D and sarcoidosis. *Curr Opin Pulm Med* 2010;**16**:487-8.
21. Sage RJ, Rao DS, Burke RR, Lim HW. Preventing vitamin D toxicity in patients with sarcoidosis. *J Am Acad Dermatol* 2011;**64**:795-6.
22. Sweiss NJ, Lower EE, Korsten P, Niewold TB, Favus MJ, Baughman RP. Bone health issues in sarcoidosis. *Curr Rheumatol Rep* 2011;**13**:265-72.
23. Angus RM, Sambrook PN, Pocock NA, Eisman JA. A simple method for assessing calcium intake in Caucasian women. *J Am Diet Assoc* 1989;**89**:209-14.
24. Holick MF. Vitamin D deficiency. *N Engl J Med* 2007;**357**:266-81.
25. Sattar N, Welsh P, Panarelli M, Forouhi NG. Increasing requests for vitamin D measurement: costly, confusing, and without credibility. *Lancet* 2012;**379**:95-6.
26. Bolland MJ, Grey A, Davidson JS, Cundy T, Reid IR. Should measurement of vitamin D and treatment of vitamin D insufficiency be routine in New Zealand? *N Z Med J* 2012;**125**:83-91.
27. Pearce SH, Cheetham TD. Diagnosis and management of vitamin D deficiency. *BMJ* 2010;**340**:b5664.
28. Murad MH, Elamin KB, Abu Elnour NO, Elamin MB, Alkatib AA, Fatourehchi MM, et al. Clinical review: The effect of vitamin D on falls: a systematic review and meta-analysis. *J Clin Endocrinol Metab* 2011;**96**:2997-3006.
29. Avenell A, Gillespie WJ, Gillespie LD, O'Connell D. Vitamin D and vitamin D analogues for preventing fractures associated with involutional and post-menopausal osteoporosis. *Cochrane Database Syst Rev* 2009:CD000227.

- 1  
2  
3 30. Elamin MB, Abu Elnour NO, Elamin KB, Fatourehchi MM, Alkatib AA, Almandoz  
4 JP, et al. Vitamin D and cardiovascular outcomes: a systematic review and meta-  
5 analysis. *J Clin Endocrinol Metab* 2011;**96**:1931-42.  
6  
7  
8 31. Chung M, Lee J, Terasawa T, Lau J, Trikalinos TA. Vitamin D With or Without  
9 Calcium Supplementation for Prevention of Cancer and Fractures: An Updated Meta-  
10 analysis for the U.S. Preventive Services Task Force. *Ann Intern Med* 2011;**155**:827-  
11 38.  
12  
13 32. Carter GD. 25-Hydroxyvitamin D assays: the quest for accuracy. *Clin Chem*  
14 2009;**55**:1300-2.  
15  
16  
17  
18  
19  
20  
21  
22  
23  
24  
25  
26  
27  
28  
29  
30  
31  
32  
33  
34  
35  
36  
37  
38  
39  
40  
41  
42  
43  
44  
45  
46  
47  
48  
49  
50  
51  
52  
53  
54  
55  
56  
57  
58  
59  
60

1  
2  
3 Figure 1: flow of participants  
4  
5  
6  
7

8 Figure 2: The effect of vitamin D supplementation on 25-hydroxyvitamin D and 1,25-  
9 dihydroxyvitamin D levels. Data are mean and 95% confidence interval. P values are for  
10 time-by-treatment interaction. Asterisks indicate significant between-groups differences at  
11 individual points.  
12  
13  
14  
15  
16  
17

18 Figure 3: The effect of vitamin D supplementation on albumin-adjusted serum calcium and  
19 24h urine calcium levels. Data are mean and 95% confidence interval. P values are for time-  
20 by-treatment interaction.  
21  
22  
23  
24  
25  
26  
27

28 Figure 4: The effect of vitamin D supplementation on bone turnover markers and serum  
29 parathyroid (PTH). Data are mean and 95% confidence interval. P values are for time-by-  
30 treatment interaction. Abbreviations: Procollagen type-I N-terminal propeptide: P1NP;  $\beta$ -C-  
31 terminal telopeptide of type I collagen:  $\beta$ -CTx  
32  
33  
34  
35  
36  
37  
38

39 Figure 5: The effect of vitamin D supplementation on bone mineral density (BMD). Data are  
40 mean and 95% confidence interval for the percentage change from baseline adjusted for  
41 baseline BMD. P values are for time-by-treatment interaction.  
42  
43  
44  
45  
46  
47  
48  
49  
50  
51  
52  
53  
54  
55  
56  
57  
58  
59  
60

1  
2  
3  
4  
5  
6  
7  
8  
9  
10  
11  
12  
13  
14  
15  
16  
17  
18  
19  
20  
21  
22  
23  
24  
25  
26  
27  
28  
29  
30  
31  
32  
33  
34  
35  
36  
37  
38  
39  
40  
41  
42  
43  
44  
45  
46  
47  
48  
49  
50  
51  
52  
53  
54  
55  
56  
57  
58  
59  
60

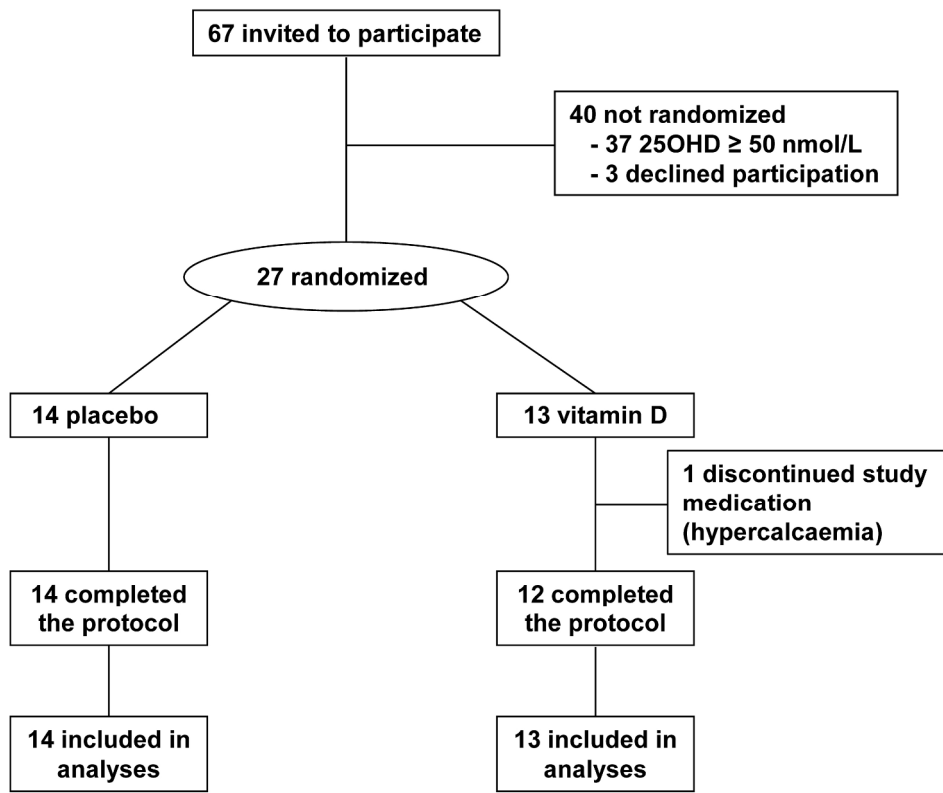

Redundant version of Figure  
116x95mm (600 x 600 DPI)

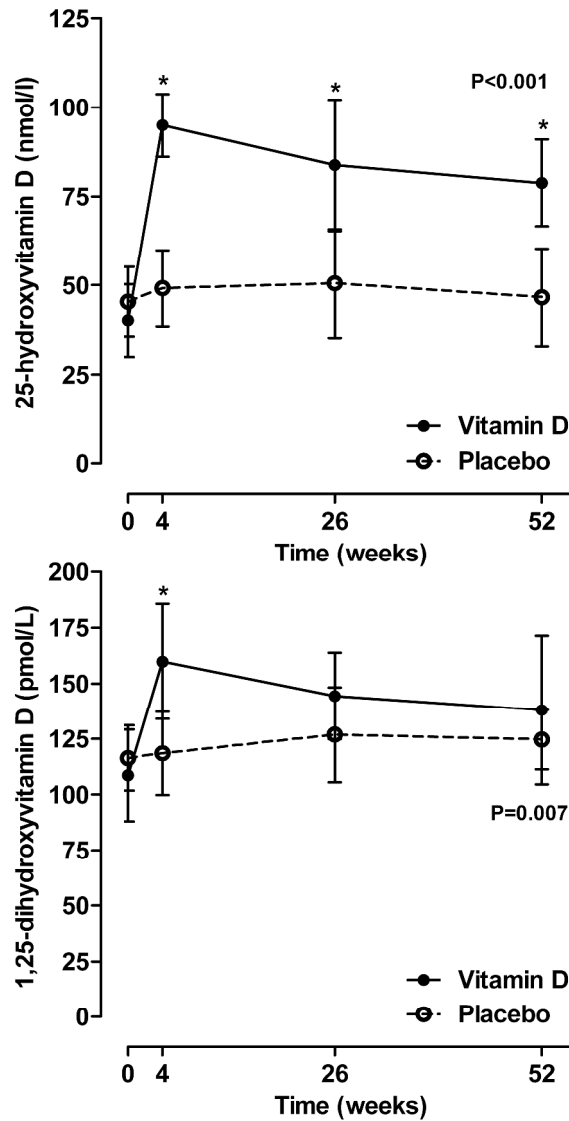

Figure 2: The effect of vitamin D supplementation on 25-hydroxyvitamin D and 1,25-dihydroxyvitamin D levels. Data are mean and 95% confidence interval. P values are for time-by-treatment interaction. Asterisks indicate significant between-groups differences at individual points.  
172x296mm (600 x 600 DPI)

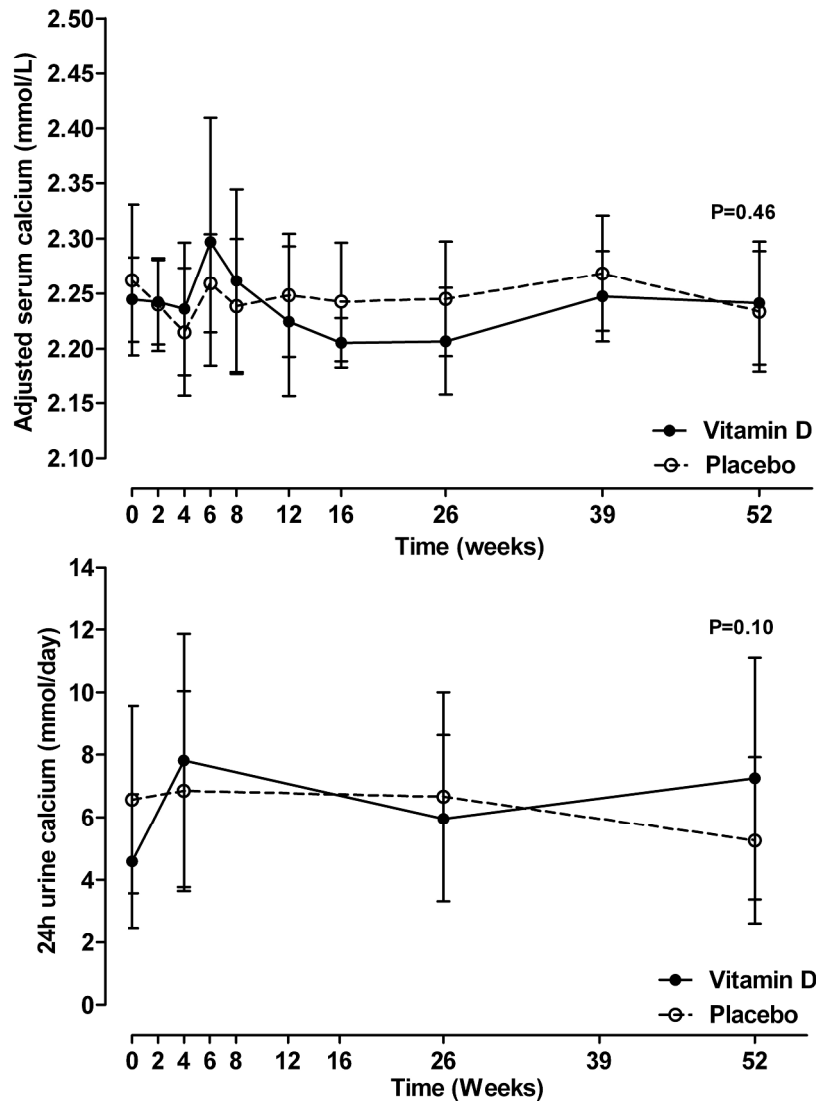

Figure 3: The effect of vitamin D supplementation on albumin-adjusted serum calcium and 24h urine calcium levels. Data are mean and 95% confidence interval. P values are for time-by-treatment interaction. 139x175mm (600 x 600 DPI)



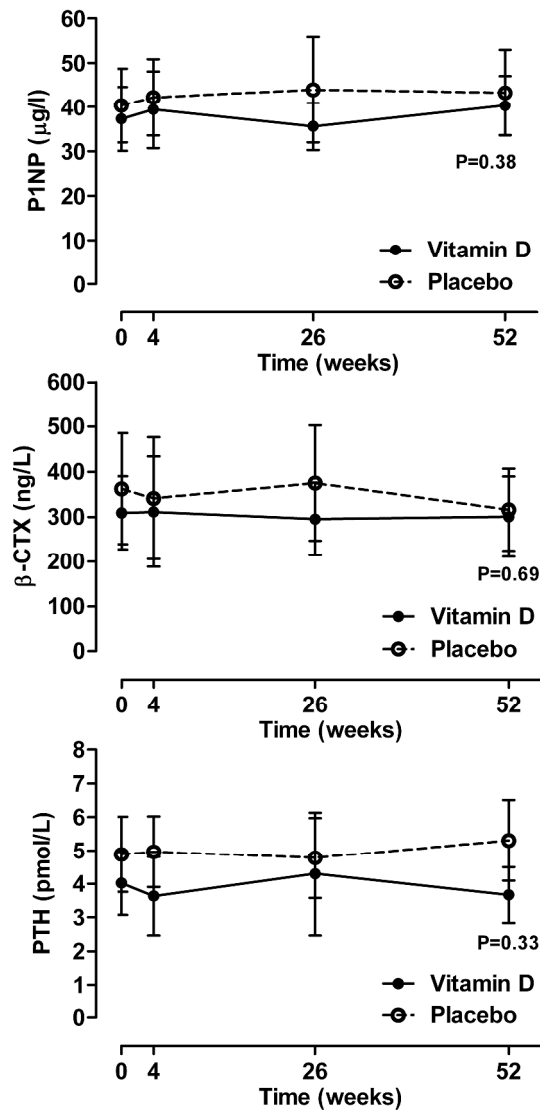

Figure 4: The effect of vitamin D supplementation on bone turnover markers and serum parathyroid (PTH). Data are mean and 95% confidence interval. P values are for time-by-treatment interaction. Abbreviations: Procollagen type-I N-terminal propeptide: P1NP;  $\beta$ -C-terminal telopeptide of type I collagen:  $\beta$ -CTX  
176x314mm (600 x 600 DPI)

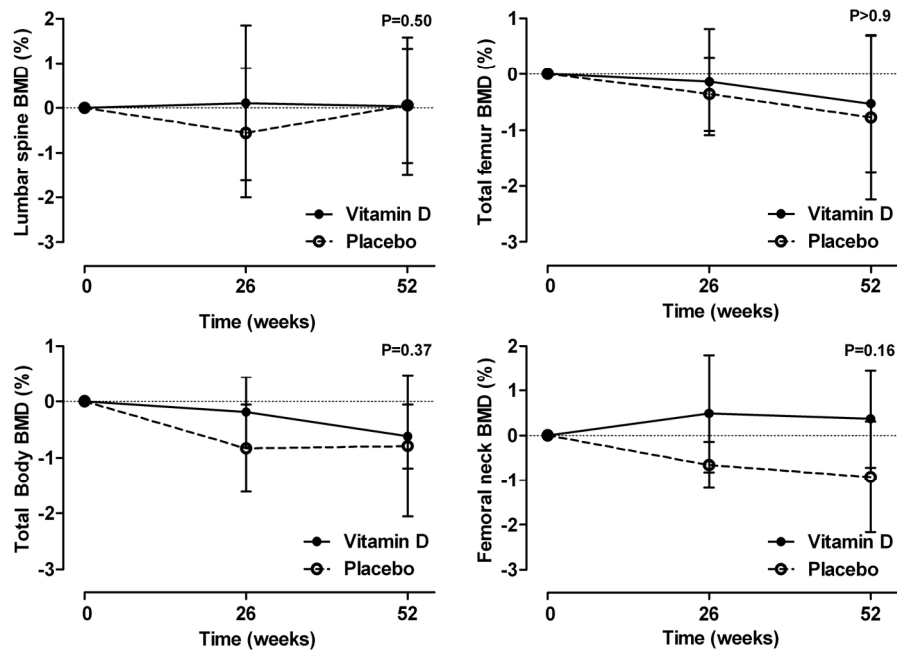

Figure 5: The effect of vitamin D supplementation on bone mineral density (BMD). Data are mean and 95% confidence interval for the percentage change from baseline adjusted for baseline BMD. P values are for time-by-treatment interaction.  
86x62mm (600 x 600 DPI)

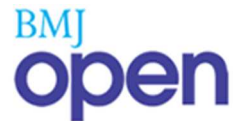

## Randomized controlled trial of vitamin D supplementation in sarcoidosis

|                                 |                                                                                                                                                                                                                                                                                                                                                                                                                                                                         |
|---------------------------------|-------------------------------------------------------------------------------------------------------------------------------------------------------------------------------------------------------------------------------------------------------------------------------------------------------------------------------------------------------------------------------------------------------------------------------------------------------------------------|
| Journal:                        | <i>BMJ Open</i>                                                                                                                                                                                                                                                                                                                                                                                                                                                         |
| Manuscript ID:                  | bmjopen-2013-003562.R1                                                                                                                                                                                                                                                                                                                                                                                                                                                  |
| Article Type:                   | Research                                                                                                                                                                                                                                                                                                                                                                                                                                                                |
| Date Submitted by the Author:   | 22-Aug-2013                                                                                                                                                                                                                                                                                                                                                                                                                                                             |
| Complete List of Authors:       | Bolland, Mark; University of Auckland, Department of Medicine<br>Wilsher, Margaret; Auckland District Health Board, Respiratory Services<br>Grey, Andrew; University of Auckland, Department of Medicine<br>Horne, Anne; University of Auckland, Department of Medicine<br>Fenwick, Sheryl; University of Auckland, Department of Medicine<br>Gamble, Greg; University of Auckland, Department of Medicine<br>Reid, Ian; University of Auckland, Department of Medicine |
| <b>Primary Subject Heading</b>: | Respiratory medicine                                                                                                                                                                                                                                                                                                                                                                                                                                                    |
| Secondary Subject Heading:      | Diabetes and endocrinology                                                                                                                                                                                                                                                                                                                                                                                                                                              |
| Keywords:                       | THORACIC MEDICINE, Clinical trials < THERAPEUTICS, Calcium & bone < DIABETES & ENDOCRINOLOGY                                                                                                                                                                                                                                                                                                                                                                            |
|                                 |                                                                                                                                                                                                                                                                                                                                                                                                                                                                         |

SCHOLARONE™  
Manuscripts

**Title:** Randomized controlled trial of vitamin D supplementation in sarcoidosis.

**Running title:** Vitamin D supplementation and sarcoidosis

**Authors:**

Mark J Bolland, MBChB, PhD,<sup>1</sup>  
Margaret L Wilsher, MD,<sup>1,2</sup>  
Andrew Grey, MD,<sup>1</sup>  
Anne M Horne, MBChB,<sup>1</sup>  
Sheryl Fenwick, BAppSc<sup>1</sup>  
Greg D Gamble, MSc<sup>1</sup>  
Ian R Reid, MD,<sup>1</sup>

**Affiliation:**

<sup>1</sup>Department of Medicine, University of Auckland, Private Bag 92 019, Auckland 1142, New Zealand; <sup>2</sup> Green Lane Respiratory Services, Auckland District Health Board, Private Bag 92024, Auckland 1142, New Zealand

**Address for correspondence/reprints:**

Mark Bolland  
Bone and Joint Research Group,  
Department of Medicine, University of Auckland  
Private Bag 92 019, Auckland 1142, New Zealand  
Email: [m.bolland@auckland.ac.nz](mailto:m.bolland@auckland.ac.nz)  
Ph 64 9 373 7999  
Fax 64 9 373 7677

**Funding:**

This study was funded by the Health Research Council of New Zealand, and the Greenlane Research and Education Fund.

**Word counts:**

Text only: 2433  
Abstract: 275  
Figures: 5  
Tables: 2

**Disclosure:** All the authors state that they have no conflicts of interest.

**Key words:** vitamin D, hypercalcaemia, sarcoidosis, bone turnover, bone mineral density

**Trial registration:** This trial is registered at the Australian New Zealand Clinical Trials Registry ([www.anzctr.org.au](http://www.anzctr.org.au)). The registration number is ACTRN12607000364471, date of registration 5/7/2007.

**Article focus:**

- The effect of vitamin D supplementation on calcium homeostasis and skeletal health in sarcoidosis
- A randomized, placebo-controlled trial of vitamin D supplements in 27 normocalcaemic patients with sarcoidosis and 25-hydroxyvitamin D <50nmol/L

**Key messages:**

- Vitamin D supplementation had no effect on serum or urine calcium, bone turnover markers or bone mineral density over 12 months, but caused 1 case of significant hypercalcaemia.
- This clinical trial suggests that vitamin D supplements are not beneficial and may be harmful for patients with sarcoidosis and mildly low vitamin D levels.

**Limitations:**

- The study had limited power to detect small differences in bone density and bone turnover markers.
- Few participants had 25-hydroxyvitamin D levels < 25 nmol/L, and therefore the findings may not apply to individuals with very low vitamin D levels.

**Abstract****Objectives:**

The role vitamin D intake/production plays in sarcoidosis-associated hypercalcaemia is uncertain. However, authoritative reviews have recommended avoiding sunlight exposure and vitamin D supplements, which might lead to adverse skeletal outcomes from vitamin D insufficiency. We investigated the effects of vitamin D supplementation on surrogate measures of skeletal health in patients with sarcoidosis and vitamin D insufficiency.

**Design:**

Randomized, placebo-controlled trial

**Setting:** Clinical research centre

**Participants:** 27 normocalcaemic patients with sarcoidosis and 25-hydroxyvitamin D (25OHD) <50nmol/L.

**Intervention:** 50,000IU weekly cholecalciferol for 4 weeks, then 50,000IU monthly for 11 months) or placebo

**Primary and secondary outcome measures:** The primary endpoint was the change in serum calcium over 12 months, and secondary endpoints included measurements of calcitropic hormones, bone turnover markers, and bone mineral density (BMD).

**Results**

1  
2  
3 The mean age of participants was 57y and 70% were female. The mean (SD) screening  
4  
5 25OHD was 35(12) and 38(9) nmol/L in the treatment and control groups, respectively.  
6  
7 Vitamin D supplementation increased 25OHD to 94 nmol/L after 4 weeks, 84 nmol/L at 6  
8  
9 months, and 78 nmol/L at 12 months, while levels remained stable in the control group. 1,25  
10  
11 dihydroxyvitamin D levels were significantly different between the groups at 4 weeks, but not  
12  
13 at 6 or 12 months. There were no between-groups differences in albumin-adjusted serum  
14  
15 calcium, 24h urine calcium, markers of bone turnover, parathyroid hormone, or BMD over  
16  
17 the trial. One participant developed significant hypercalcaemia after 6 weeks (total  
18  
19 cholecalciferol dose 250,000IU).  
20  
21  
22  
23  
24

## 25 **Conclusions**

26  
27 In patients with sarcoidosis and 25OHD <50nmol/L, vitamin D supplements did not alter  
28  
29 average serum calcium or urine calcium, but had no benefit on surrogate markers of skeletal  
30  
31 health and caused one case of significant hypercalcaemia.  
32  
33  
34  
35

36 **Trial registration:** This trial is registered at the Australian New Zealand Clinical Trials  
37  
38 Registry ([www.anzctr.org.au](http://www.anzctr.org.au)). The registration number is ACTRN12607000364471, date of  
39  
40 registration 5/7/2007.  
41  
42  
43  
44  
45  
46  
47  
48  
49  
50  
51  
52  
53  
54  
55  
56  
57  
58  
59  
60

**Introduction:**

Hypercalcaemia occurs commonly in sarcoidosis, with an estimated prevalence of 4-11%. [1,2] Hypercalcaemia results from dysregulated production of 1,25-dihydroxyvitamin D (1,25OHD) by activated macrophages in granulomata. [3] Although the mechanism of hypercalcaemia is known, the role of vitamin D intake and production is less certain. On one hand, cases of hypercalcaemia and sarcoidosis precipitated by sunlight exposure or vitamin D supplements have been reported, [4-8] and there is seasonal variation in 1,25OHD levels [9] and the prevalence of hypercalcaemia. [7, 9, 10] These findings suggest that increases in 25-hydroxyvitamin D (25OHD) levels through sunlight exposure or vitamin D intake contribute to the hypercalcaemia. On the other hand, studies have reported no correlation between 25OHD, 1,25OHD, and serum calcium, [11] historical studies of treatment with very large doses of vitamin D (target 100,000 IU/d for 5-212 days) produced hypercalcaemia in only 4/24 patients, [12] and patients with sarcoidosis and glucocorticoid-induced osteoporosis commonly take vitamin D supplements without developing hypercalcaemia. [13] Furthermore, countries at higher latitudes do not have consistently lower prevalence of hypercalcaemia in sarcoidosis than countries closer to the equator, [1] and prevalence of hypercalcaemia in sarcoidosis is similar in countries with and without dietary vitamin D fortification. [6] These findings suggest that vitamin D intake and production are not the sole causes of hypercalcaemia in sarcoidosis.

Despite the conflicting evidence over the role of vitamin D intake/production in sarcoidosis-associated hypercalcaemia, several authoritative reviews have recommended avoidance of sunlight exposure and vitamin D supplements. [6-8] Adopting such recommendations is likely to lead to vitamin D insufficiency, which is associated with a number of adverse skeletal outcomes including secondary hyperparathyroidism, increased bone turnover, low bone



1  
2  
3 mineral density (BMD) and increased risk of fracture.[14] There is a high prevalence of low  
4  
5 BMD in cross-sectional studies of patients with sarcoidosis,[7 ,13 ,15-18] and glucocorticoid  
6  
7 use is common and well known to have adverse skeletal effects. Thus, it is possible that  
8  
9 treatment recommendations of sarcoidosis may worsen skeletal health by inadvertently  
10  
11 promoting vitamin D insufficiency.  
12  
13

14  
15  
16 There has been recent interest in the effects of vitamin D supplements in patients with  
17  
18 sarcoidosis.[19-22] We have carried out a randomized controlled trial to determine the effects  
19  
20 of vitamin D supplementation on surrogate measures of skeletal health in patients with  
21  
22 sarcoidosis and vitamin D insufficiency.  
23  
24

## 25 26 27 **Methods:**

### 28 29 Participants:

30  
31 Patients with sarcoidosis attending the interstitial lung disease clinic at our hospital were invited  
32  
33 to participate. Newspaper advertisements were also placed. Potential participants were eligible if  
34  
35 they had sarcoidosis diagnosed by biopsy and/or typical pattern on high resolution computed  
36  
37 tomography and screening 25OHD <50 nmol/L, but were excluded if they had serum creatinine  
38  
39 >150 umol/L, nephrocalcinosis, albumin-adjusted serum calcium >2.55 mmol/L, concurrent  
40  
41 major systemic illness, or BMD T score <-2.5 at the spine or hip. Participants were recruited  
42  
43 between September 2007 and December 2010. The flow of participants is shown in Figure 1.  
44  
45  
46  
47  
48

### 49 50 Protocol

51  
52 Participants were randomized to receive either 50,000 IU of cholecalciferol or placebo weekly  
53  
54 for four weeks followed by 50,000 IU cholecalciferol or placebo every month for 11 months.  
55

56 Patients were asked to continue their usual diet to maintain their dietary calcium intake in  
57

1  
2  
3 accordance with locally recommended practice. Calcium supplements were not administered.  
4  
5 Treatment allocations were randomized by the study statistician, using a variable block size  
6  
7 schedule, based on computer-generated random numbers. Study medication was dispensed into  
8  
9 identical bottles and labelled with participant numbers by a staff member not otherwise involved  
10  
11 in the study. To ensure masking, only the statistician and this staff member had access to  
12  
13 treatment allocation, and neither had contact with participants. All other study personnel and  
14  
15 participants were blinded to treatment allocation throughout. The study received ethical  
16  
17 approval from the Northern X regional ethics committee and the trial was registered with the  
18  
19 Australian New Zealand Clinical Trials Registry, ACTRN12607000364471. All participants  
20  
21 gave written, informed consent.  
22  
23  
24  
25  
26

27 The primary endpoint was the change in serum calcium over 12 months with vitamin D  
28  
29 supplementation. Secondary endpoints were the change in urine calcium, change in markers of  
30  
31 bone turnover, and change in BMD over 12 months. It was planned to recruit 40 participants, for  
32  
33 which the study had >80% power ( $\alpha = 0.05$ ) to detect a difference in serum calcium of 0.10  
34  
35 mmol/L between groups. Recruitment was stopped after more than 3y when 27 participants were  
36  
37 recruited.  
38  
39  
40  
41  
42

#### 43 Measurements:

44  
45 At baseline, every 2 weeks for 8 weeks, then at 12, 16, 26, 39, and 52 weeks, fasting blood  
46  
47 and second-voided morning urine samples were collected. Samples for calcitropic hormones  
48  
49 and bone turnover markers were stored at  $-70^{\circ}\text{C}$  until they were batch-analyzed. At baseline,  
50  
51 4, 26, and 52 weeks, 24h urine samples were collected. The following assays were used: the  
52  
53 screening 25OHD was measured by radioimmunoassay (RIA) (DiaSorin, Stillwater, MN), but  
54  
55 all 25OHD samples from the study including the baseline sample were measured by liquid  
56  
57  
58  
59  
60

1  
2  
3 chromatography- tandem mass spectrometry (LC-MS/MS) (ABSciex API 4000); 1,25OHD  
4  
5 by RIA (IDS, Tyne and Wear, UK), serum parathyroid hormone (PTH) by  
6  
7 electrochemiluminescence immunoassay (E170, Roche Diagnostics, Indianapolis, IN); serum  
8  
9 procollagen type-I N-terminal propeptide (P1NP) and serum  $\beta$ -C-terminal telopeptide of type I  
10  
11 collagen (CTX) by the Roche Elecsys 2010 platform (Roche Diagnostics, Indianapolis, IN).  
12  
13  
14 BMD was measured every 6 months at the lumbar spine, proximal femur and total body using a  
15  
16 GE Prodigy dual-energy x-ray absorptiometer (DXA) (GE Lunar, Madison WI). Daily calcium  
17  
18 intake was assessed at baseline using a validated questionnaire.[23]  
19  
20

### 21 22 23 Statistics:

24  
25 Baseline differences between groups for continuous variables were assessed using Student's t-  
26  
27 test, and for categorical variables using the Chi-Square test. All analyses were carried out on an  
28  
29 intention-to-treat basis. A mixed models approach to repeated measures with an unstructured  
30  
31 covariance structure was used to examine the time course of response in the treatment and  
32  
33 control arms for serum calcium, urine calcium, calcitropic hormones, bone turnover markers and  
34  
35 BMD measurements by fitting main and treatment-by-time interaction effects. Post-hoc  
36  
37 comparisons between groups at individual time points were explored using the method of Tukey.  
38  
39 BMD data were analyzed using raw data, although results are presented as percentage change  
40  
41 from baseline adjusted for baseline between-groups differences, for ease of interpretation. All  
42  
43 tests were two-tailed and hypothesis tests were deemed significant for  $P < 0.05$ . All statistical  
44  
45 analyses were carried out using the SAS software package (SAS Institute, Cary, NC version 9.2)  
46  
47  
48  
49  
50

### 51 52 **Results:**

53  
54 The baseline characteristics of the two groups were similar (Table 1). The mean (range) 25OHD  
55  
56 at the study screening visit was 35 (14-48) nmol/L in the treatment group, and 38 (12-49)  
57  
58  
59  
60

1  
2  
3 nmol/L in the controls. The baseline 25OHD measurements from the first study visit (average 3  
4 weeks after screening 25OHD) that were stored and then measured at the end of the study using  
5 a different assay were slightly higher than the screening 25OHD in both groups (Table 1).  
6  
7

8  
9 Vitamin D supplementation led to an immediate increase in 25OHD levels, and a sustained  
10 difference between the groups that persisted throughout the trial ( $P<0.001$ ) (Figure 2). There was  
11 also an immediate increase in 1,25OHD levels in response to vitamin D supplementation, but  
12 this did not persist. While the between-groups differences over the trial were statistically  
13 significant ( $P=0.007$ ), by the end of the trial 1,25OHD levels were similar in both groups (Figure  
14 2).  
15  
16  
17  
18  
19  
20  
21  
22  
23  
24

25 Figure 3 shows that vitamin D supplements had no effect on either average albumin-adjusted  
26 serum calcium ( $P=0.46$ ) or 24h urine calcium levels ( $P=0.10$ ) throughout the trial. There were no  
27 between-group differences at any time point in participants with 24h urine calcium  $> 10$   
28 mmol/day (baseline vitamin D vs control- 1 vs. 4; 4 weeks- 4 vs. 4; 16 weeks 1 vs. 2; 52 weeks –  
29 3 vs. 2). One participant in the vitamin D group and none in the control group had sustained  
30 hypercalcaemia with 24h urine calcium  $> 10$  mmol/day in all 3 visits during follow-up. One  
31 participant developed hypercalcaemia during the trial- a 51y old female, diagnosed with  
32 sarcoidosis 2y prior to study entry, with bilateral hilar lymphadenopathy, liver, and lung  
33 involvement. She was taking inhaled glucocorticoids at study entry but no other medication. She  
34 was assigned to vitamin D treatment and Table 2 shows that hypercalcaemia was recognized at 6  
35 weeks, by which time she had taken five 50,000 IU doses of cholecalciferol. She was vitamin D  
36 deficient at baseline, and treatment increased her 25OHD level to 69 nmol/L. There was a  
37 marked increase in 1,25OHD, 24h urine calcium, serum phosphate, and creatinine levels and  
38 suppression of PTH levels following vitamin D supplementation, but she remained  
39 asymptomatic throughout. No further study medication was taken and the biochemical  
40  
41  
42  
43  
44  
45  
46  
47  
48  
49  
50  
51  
52  
53  
54  
55  
56  
57  
58  
59  
60

1  
2  
3 abnormalities resolved without specific treatment by week 16 of the trial. When this participant  
4  
5 was excluded from the analyses for serum calcium and 24h urine calcium, the results did not  
6  
7 change substantially except there was no visible rise in the average albumin-adjusted serum  
8  
9 calcium at 6 and 8 weeks in the vitamin D group (data not shown).  
10

11  
12  
13  
14 The effect of vitamin D supplements on bone turnover markers and PTH are shown in Figure 4  
15  
16 and on BMD in Figure 5. Vitamin D supplementation had no effect on any of these variables  
17  
18 ( $P>0.16$  for all variables).  
19

20  
21  
22  
23 Other than the 1 participant treated with vitamin D who developed hypercalcaemia (proportion  
24  
25 8%, 95% confidence interval 1-33%), there were no other adverse events potentially related to  
26  
27 treatment during the trial. 1 participant (randomized to vitamin D) required prolonged treatment  
28  
29 with oral glucocorticoids, and 1 participant (randomized to placebo) received a single infusion of  
30  
31 zoledronic acid at 11 months, because of an underlying neurological disorder that had led to an  
32  
33 increased risk of falls and fracture.  
34  
35  
36  
37

### 38 **Discussion:**

39  
40 Vitamin D supplementation of patients with sarcoidosis and vitamin D insufficiency did not alter  
41  
42 average serum calcium or urine calcium levels, but also did not affect BMD or markers of bone  
43  
44 turnover, and caused one case of significant hypercalcaemia. 25OHD levels were in a range  
45  
46 many experts consider sub-optimal at baseline (average  $<50$  nmol/L) and vitamin D  
47  
48 supplementation led to average 25OHD levels of  $>75$  nmol/L throughout the trial, levels  
49  
50 generally considered to indicate adequate vitamin D status. Thus, our findings of an absence of  
51  
52 benefit from vitamin D supplements, together with infrequent but significant hypercalcaemia,  
53  
54  
55  
56  
57  
58  
59  
60

1  
2  
3 suggest that there is little indication for vitamin D supplements in patients with sarcoidosis and  
4  
5 vitamin D insufficiency.  
6  
7

8  
9  
10 Recent research has linked low 25OHD levels with numerous adverse non-skeletal  
11  
12 outcomes.[24] This information, when added to the existing data linking low 25OHD levels with  
13  
14 adverse skeletal outcomes,[14] has lead to renewed interest in the role of vitamin D in health. In  
15  
16 clinical practice, there has been a large increase in measurement of 25OHD[25 ,26] and calls for  
17  
18 widespread vitamin D supplementation.[27] However, these associations between low vitamin D  
19  
20 status and adverse health outcomes have been generated from observational studies which  
21  
22 cannot determine causality. There are now a growing number of randomized controlled trials  
23  
24 that have not shown benefits from vitamin D supplements on a wide range of endpoints. Thus,  
25  
26 meta-analyses of such trials have shown no benefit of vitamin D supplementation (when used  
27  
28 without co-administered calcium supplements) on falls,[28] fractures,[29] mortality,[30]  
29  
30 cardiovascular events,[30] and cancer.[31] In our study, which was powered to assess serum  
31  
32 calcium rather than BMD effects, we did not find evidence for benefit of vitamin D supplements  
33  
34 on surrogate markers of skeletal health in a group of patients with sarcoidosis who had mildly  
35  
36 low 25OHD levels, consistent with these findings.  
37  
38  
39  
40  
41  
42

43 The mechanism of hypercalcaemia in sarcoidosis is well described. Extra-renal production of  
44  
45 1,25OHD in activated macrophages in granulomata leads to increased intestinal calcium  
46  
47 absorption and increased bone resorption which collectively produce hypercalcaemia.[3] It is  
48  
49 unclear whether circulating 25OHD levels are implicated in causing hypercalcaemia, with some  
50  
51 evidence supporting [4-10] and some not supporting [1 ,6 ,11-13] each viewpoint, as discussed  
52  
53 earlier. Our study tends to support the former view for two reasons: firstly, one patient developed  
54  
55 significant hypercalcaemia within a short time of starting vitamin D supplements, and there was  
56  
57  
58  
59  
60

1  
2  
3 prompt resolution of the hypercalcaemia without other treatment after the supplements were  
4 stopped. Secondly, in the entire cohort there was a rapid increase in 1,25OHD with vitamin D  
5 supplements, although the increase did not persist. Both pieces of data suggest that abrupt  
6 changes in 25OHD can increase 1,25OHD, and in a minority of patients this can cause  
7 hypercalcaemia. The characteristics that predispose to the development of hypercalcaemia  
8 remain unclear. It is possible that increasing 25OHD more slowly using small, incrementally  
9 increasing doses of vitamin D, may avoid this complication, but this would need to be tested in  
10 closely monitored clinical trials.  
11  
12  
13  
14  
15  
16  
17  
18  
19

20  
21  
22 Our study has several limitations. It is a small study and therefore may be at risk of Type II error.  
23 We carried out simulations to explore what effect sizes could have been statistically significant  
24 in this study. We simulated an increased effect size in the treatment group (without varying data  
25 in the placebo group or the sample size) in the models used in the study analyses. A difference  
26 between the groups at 1y of 0.06 mmol/L in serum calcium, the primary endpoint, would have  
27 reached conventional statistical significance. This is 60% of the value used in the study power  
28 calculation (0.1 mmol/L) that we considered to be clinically relevant when designing the study.  
29 Similarly, the corresponding between-groups differences that would have reached statistical  
30 significance for the other main endpoints were: 2.4 pmol/L for PTH, 7 µg/L for P1NP, 140 ng/L  
31 for CTX, and 0.5% - 1.9% for BMD, depending on site. Differences below these amounts would  
32 be of questionable clinical relevance. Thus, while small, the study did have more than adequate  
33 power to detect clinically relevant differences. A second limitation is regarding the screening  
34 vitamin D measurement. All participants had 25OHD <50 nmol/L at the screening visit  
35 measured using a Diasorin RIA. All study samples for 25OHD were frozen and then assayed in  
36 a single batch at another laboratory using an LC-MS/MS assay. The 25OHD levels measured  
37 using LC-MS/MS were on average slightly higher than those measured using the Diasorin  
38  
39  
40  
41  
42  
43  
44  
45  
46  
47  
48  
49  
50  
51  
52  
53  
54  
55  
56  
57  
58  
59  
60

1  
2  
3 immunoassay, and 9/27 participants had 25OHD > 50 nmol/L at the baseline visit. Variation  
4  
5 between results from different 25OHD assays is well-described, and while LC-MS/MS is  
6  
7 usually considered the gold standard, both immunoassays and LC-MS/MS have limitations.[32]  
8  
9 Few participants had 25OHD < 25 nmol at baseline, thus our results may not apply to  
10  
11 individuals with very low 25OHD levels.  
12  
13

14  
15  
16 In summary, we did not find evidence of benefits on surrogate markers of skeletal health from  
17  
18 vitamin D supplementation in patients with sarcoidosis and vitamin D insufficiency. However,  
19  
20 there was evidence of harm with one case of significant hypercalcaemia. The absence of benefit  
21  
22 together with the risk of infrequent but significant adverse effects suggests that there is little  
23  
24 indication for vitamin D supplements in patients with sarcoidosis and vitamin D levels in the  
25  
26 range in this study (12 – 49 nmol/L).  
27  
28  
29  
30  
31  
32  
33  
34  
35  
36  
37  
38  
39  
40  
41  
42  
43  
44  
45  
46  
47  
48  
49  
50  
51  
52  
53  
54  
55  
56  
57  
58  
59  
60



**Funding:**

This study was funded by the Health Research Council of New Zealand, and the Greenlane Research and Education Fund. The sponsors of the study had no role in design and conduct of the study; collection, management, analysis, and interpretation of the data; and preparation, review, or approval of the manuscript.

**Disclosure:** All the authors state that they have no conflicts of interest.

**Contributorship:**

MB, AG, AH, IR, and MW designed the study. SF and AH ran the study. MB and GG carried out the statistical analyses. MB drafted the article. All authors critically reviewed the draft manuscript and approved the final version. MB is the guarantor of the article.

**Data sharing:**

There are no additional data available.

## References

1. James DG, Neville E, Siltzbach LE. A worldwide review of sarcoidosis. *Ann N Y Acad Sci* 1976;**278**:321-34.
2. Baughman RP, Teirstein AS, Judson MA, Rossman MD, Yeager H, Jr., Bresnitz EA, et al. Clinical characteristics of patients in a case control study of sarcoidosis. *Am J Respir Crit Care Med* 2001;**164**:1885-9.
3. Singer FR, Adams JS. Abnormal calcium homeostasis in sarcoidosis. *N Engl J Med* 1986;**315**:755-7.
4. Bell NH, Gill JR, Jr., Bartter FC. On the Abnormal Calcium Absorption in Sarcoidosis. Evidence for Increased Sensitivity to Vitamin D. *Am J Med* 1964;**36**:500-13.
5. Sandler LM, Winearls CG, Fraher LJ, Clemens TL, Smith R, O'Riordan JL. Studies of the hypercalcaemia of sarcoidosis: effect of steroids and exogenous vitamin D3 on the circulating concentrations of 1,25-dihydroxy vitamin D3. *Q J Med* 1984;**53**:165-80.
6. Sharma OP. Vitamin D, calcium, and sarcoidosis. *Chest* 1996;**109**:535-9.
7. Rizzato G. Clinical impact of bone and calcium metabolism changes in sarcoidosis. *Thorax* 1998;**53**:425-9.
8. Conron M, Young C, Beynon HL. Calcium metabolism in sarcoidosis and its clinical implications. *Rheumatology (Oxford)* 2000;**39**:707-13.
9. Bonnema SJ, Moller J, Marving J, Kvetny J. Sarcoidosis causes abnormal seasonal variation in 1,25-dihydroxy-cholecalciferol. *J Intern Med* 1996;**239**:393-8.
10. Taylor RL, Lynch HJ, Jr., Wysor WG, Jr. Seasonal influence of sunlight on the hypercalcemia of sarcoidosis. *Am J Med* 1963;**34**:221-7.

- 1  
2  
3 11. Alberts C, van den Berg H. Calcium metabolism in sarcoidosis. A follow-up study  
4 with respect to parathyroid hormone and vitamin D metabolites. *Eur J Respir Dis*  
5 1986;**68**:186-94.  
6  
7
- 8  
9 12. Larsson LG, Liljestrand A, Wahlund H. Treatment of sarcoidosis with calciferol. *Acta*  
10 *Med Scand* 1952;**143**:281-87.  
11
- 12 13. Adler RA, Funkhouser HL, Petkov VI, Berger MM. Glucocorticoid-induced  
13 osteoporosis in patients with sarcoidosis. *Am J Med Sci* 2003;**325**:1-6.  
14  
15
- 16 14. Lips P. Vitamin D deficiency and secondary hyperparathyroidism in the elderly:  
17 consequences for bone loss and fractures and therapeutic implications. *Endocr Rev*  
18 2001;**22**:477-501.  
19  
20
- 21 15. Montemurro L, Fraioli P, Rizzato G. Bone loss in untreated longstanding sarcoidosis.  
22 *Sarcoidosis* 1991;**8**:29-34.  
23  
24
- 25 16. Rottoli P, Gonnelli S, Silitro S, Zacchei F, Fabbrini D, Gennari C, et al. Alterations in  
26 calcium metabolism and bone mineral density in relation to the activity of sarcoidosis.  
27 *Sarcoidosis* 1993;**10**:161-2.  
28  
29
- 30 17. Hamada K, Nagai S, Tsutsumi T, Izumi T. Bone mineral density and vitamin D in  
31 patients with sarcoidosis. *Sarcoidosis Vasc Diffuse Lung Dis* 1999;**16**:219-23.  
32  
33
- 34 18. Sipahi S, Tuzun S, Ozaras R, Calis HT, Ozaras N, Tuzun F, et al. Bone mineral  
35 density in women with sarcoidosis. *J Bone Miner Metab* 2004;**22**:48-52.  
36  
37
- 38 19. Burke RR, Rybicki BA, Rao DS. Calcium and vitamin D in sarcoidosis: how to assess  
39 and manage. *Semin Respir Crit Care Med* 2010;**31**:474-84.  
40  
41
- 42 20. Sharma OP. Vitamin D and sarcoidosis. *Curr Opin Pulm Med* 2010;**16**:487-8.  
43  
44
- 45 21. Sage RJ, Rao DS, Burke RR, Lim HW. Preventing vitamin D toxicity in patients with  
46 sarcoidosis. *J Am Acad Dermatol* 2011;**64**:795-6.  
47  
48  
49  
50  
51  
52  
53  
54  
55  
56  
57

- 1
- 2
- 3 22. Sweiss NJ, Lower EE, Korsten P, Niewold TB, Favus MJ, Baughman RP. Bone health
- 4 issues in sarcoidosis. *Curr Rheumatol Rep* 2011;**13**:265-72.
- 5
- 6
- 7 23. Angus RM, Sambrook PN, Pocock NA, Eisman JA. A simple method for assessing
- 8 calcium intake in Caucasian women. *J Am Diet Assoc* 1989;**89**:209-14.
- 9
- 10
- 11 24. Holick MF. Vitamin D deficiency. *N Engl J Med* 2007;**357**:266-81.
- 12
- 13
- 14 25. Sattar N, Welsh P, Panarelli M, Forouhi NG. Increasing requests for vitamin D
- 15 measurement: costly, confusing, and without credibility. *Lancet* 2012;**379**:95-6.
- 16
- 17
- 18 26. Bolland MJ, Grey A, Davidson JS, Cundy T, Reid IR. Should measurement of vitamin
- 19 D and treatment of vitamin D insufficiency be routine in New Zealand? *N Z Med J*
- 20 2012;**125**:83-91.
- 21
- 22
- 23 27. Pearce SH, Cheetham TD. Diagnosis and management of vitamin D deficiency. *BMJ*
- 24 2010;**340**:b5664.
- 25
- 26
- 27
- 28 28. Murad MH, Elamin KB, Abu Elnour NO, Elamin MB, Alkatib AA, Fatourechi MM,
- 29 et al. Clinical review: The effect of vitamin D on falls: a systematic review and meta-
- 30 analysis. *J Clin Endocrinol Metab* 2011;**96**:2997-3006.
- 31
- 32
- 33 29. Avenell A, Gillespie WJ, Gillespie LD, O'Connell D. Vitamin D and vitamin D
- 34 analogues for preventing fractures associated with involutional and post-menopausal
- 35 osteoporosis. *Cochrane Database Syst Rev* 2009:CD000227.
- 36
- 37
- 38 30. Elamin MB, Abu Elnour NO, Elamin KB, Fatourechi MM, Alkatib AA, Almandoz
- 39 JP, et al. Vitamin D and cardiovascular outcomes: a systematic review and meta-
- 40 analysis. *J Clin Endocrinol Metab* 2011;**96**:1931-42.
- 41
- 42
- 43 31. Chung M, Lee J, Terasawa T, Lau J, Trikalinos TA. Vitamin D With or Without
- 44 Calcium Supplementation for Prevention of Cancer and Fractures: An Updated Meta-
- 45 analysis for the U.S. Preventive Services Task Force. *Ann Intern Med* 2011;**155**:827-
- 46 38.
- 47
- 48
- 49
- 50
- 51
- 52
- 53
- 54
- 55
- 56
- 57
- 58
- 59
- 60

- 1  
2  
3 32. Carter GD. 25-Hydroxyvitamin D assays: the quest for accuracy. Clin Chem  
4  
5 2009;**55**:1300-2.  
6  
7  
8  
9  
10  
11  
12  
13  
14  
15  
16  
17  
18  
19  
20  
21  
22  
23  
24  
25  
26  
27  
28  
29  
30  
31  
32  
33  
34  
35  
36  
37  
38  
39  
40  
41  
42  
43  
44  
45  
46  
47  
48  
49  
50  
51  
52  
53  
54  
55  
56  
57  
58  
59  
60

For peer review only

Table 1: Baseline characteristics

|                                    | Vitamin D<br>n=13 | Placebo<br>n=14 |
|------------------------------------|-------------------|-----------------|
| Age (y)                            | 56 (10)           | 57 (9)          |
| Female                             | 10 (77)           | 9 (64)          |
| Ethnicity                          |                   |                 |
| European                           | 10 (77)           | 9 (64)          |
| Indian                             | 1 (8)             | 3 (21)          |
| Other                              | 1 (8)             | 2 (14)          |
| Weight (kg)                        | 75 (19)           | 72 (13)         |
| Dietary calcium intake (mg/d)      | 730 (670)         | 660 (330)       |
| Smoking status                     |                   |                 |
| Current                            | 3 (23)            | 0 (0)           |
| Never Smoked                       | 8 (63)            | 9 (64)          |
| Glucorticoid use                   |                   |                 |
| Past oral use                      | 7 (54)            | 9 (64)          |
| Current oral use                   | 1 (8)             | 0 (0)           |
| Current inhaled use                | 6 (46)            | 1 (7)           |
| Sarcoidosis extent                 |                   |                 |
| Pulmonary involvement              | 11 (85)           | 8 (57)          |
| Extra-pulmonary involvement        | 6 (46)            | 7 (50)          |
| Chest radiograph stage at baseline |                   |                 |
| Stage 0                            | 1 (10)            | 6 (46)          |
| Stage 1                            | 1 (10)            | 1 (8)           |
| Stage 2                            | 1 (10)            | 0 (0)           |
| Stage 3                            | 3 (30)            | 4 (31)          |
| Stage 4                            | 4 (40)            | 2 (15)          |
| Bone density (g/cm <sup>2</sup> )  |                   |                 |
| Lumbar spine                       | 1.16 (0.19)       | 1.13 (0.11)     |
| T score                            | -0.2 (1.6)        | -0.6 (0.9)      |
| Total hip                          | 0.95 (0.11)       | 0.93 (0.11)     |
| T score                            | -0.6 (0.9)        | -0.8 (0.9)      |
| Femoral neck                       | 0.89 (0.13)       | 0.91 (0.09)     |
| T score                            | -1.2 (1.0)        | -0.9 (0.7)      |
| Total body                         | 1.15 (0.10)       | 1.11 (0.07)     |
| Adjusted serum calcium (mmol/L)    | 2.24 (0.06)       | 2.26 (0.12)     |
| Serum phosphate (mmol/L)           | 1.23 (0.15)       | 1.06 (0.17)     |
| Serum creatinine (mmol/L)          | 74 (14)           | 77 (12)         |
| 24 hr urine calcium (mmol/d)       | 4.6 (3.4)         | 6.6 (5.2)       |

|                                                   |           |           |
|---------------------------------------------------|-----------|-----------|
| Screening 25 hydroxyvitamin D (nmol) <sup>a</sup> | 35 (12)   | 38 (9)    |
| Baseline 25 hydroxyvitamin D (nmol) <sup>a</sup>  | 40 (17)   | 45 (17)   |
| 1,25 dihydroxyvitamin D (pmol/L)                  | 109 (34)  | 116 (25)  |
| Parathyroid hormone (pmol/L)                      | 4.0 (1.6) | 4.9 (2.0) |
| P1NP (ug/L)                                       | 37 (12)   | 40 (15)   |
| β-CTX (ng/L)                                      | 310 (130) | 360 (210) |

<sup>a</sup> 25-hydroxyvitamin D were measured at the screening study visit using a Diasorin assay, while the baseline 25-hydroxyvitamin D at the first study visit (average 3 weeks later) were stored frozen until the end of the study and then measured with a liquid chromatography tandem mass spectrometry assay (see text). Data are mean (SD) or n (%). Abbreviations: P1NP- serum procollagen type-I N-terminal propeptide; β-CTX - serum β-C-terminal telopeptide of type I collagen.

Table 2: Time course of hypercalcaemia in patient randomized to vitamin D supplements

| Week <sup>a</sup> | Dietary calcium (mg/d) | Serum calcium <sup>b</sup> (mmol/L) | Serum phosphate (mmol/L) | Serum creatinine (μmol/L) | 24h urine calcium (mmol/d) | 25OHD (nmol/L) | 1,25OHD (pmol/L) | PTH (pmol/L) |
|-------------------|------------------------|-------------------------------------|--------------------------|---------------------------|----------------------------|----------------|------------------|--------------|
| 0                 | 460                    | 2.26                                | 1.24                     | 76                        | 4.2                        | 18             | 77               | 2.3          |
| 2                 |                        | 2.36                                | 1.28                     | 74                        |                            |                |                  |              |
| 4                 |                        | 2.48                                | 1.57                     | 83                        | 14.4                       | 69             | 218              | 0.9          |
| 6                 |                        | 2.88                                | 1.55                     | 112                       |                            |                |                  |              |
| 7                 |                        | 2.87                                | 1.31                     | 125                       |                            |                |                  |              |
| 8                 |                        | 2.65                                | 1.45                     | 124                       |                            |                |                  |              |
| 12                |                        | 2.46                                | 1.23                     | 93                        |                            |                |                  |              |
| 16                |                        | 2.22                                | 1.14                     | 75                        |                            |                |                  |              |
| 26                |                        | 2.28                                | 1.04                     | 71                        |                            | 31             | 81               | 2.2          |
| 52                |                        | 2.27                                | 1.11                     | 78                        | 6.7                        | 41             | 77               | 2.1          |

<sup>a</sup> study treatment was stopped at 6 weeks when hypercalcaemia was recognised. The last dose was taken at week 5, and five 50,000 IU doses of cholecalciferol were taken over 5 weeks.

<sup>b</sup> albumin-adjusted serum calcium.

Abbreviations : 25OHD 25-hydroxyvitamin D, 1,25OHD 1,25-dihydroxyvitamin D, PTH-parathyroid hormone.



1  
2  
3 Figure 1: flow of participants  
4  
5  
6

7 Figure 2: The effect of vitamin D supplementation on 25-hydroxyvitamin D and 1,25-  
8 dihydroxyvitamin D levels. Data are mean and 95% confidence interval. P values are for  
9 time-by-treatment interaction. Asterisks indicate significant between-groups differences at  
10 individual points.  
11  
12  
13  
14  
15  
16  
17

18 Figure 3: The effect of vitamin D supplementation on albumin-adjusted serum calcium and  
19 24h urine calcium levels. Data are mean and 95% confidence interval. P values are for time-  
20 by-treatment interaction.  
21  
22  
23  
24  
25  
26

27 Figure 4: The effect of vitamin D supplementation on bone turnover markers and serum  
28 parathyroid (PTH). Data are mean and 95% confidence interval. P values are for time-by-  
29 treatment interaction. Abbreviations: Procollagen type-I N-terminal propeptide: P1NP;  $\beta$ -C-  
30 terminal telopeptide of type I collagen:  $\beta$ -CTx  
31  
32  
33  
34  
35  
36  
37

38 Figure 5: The effect of vitamin D supplementation on bone mineral density (BMD). Data are  
39 mean and 95% confidence interval for the percentage change from baseline adjusted for  
40 baseline BMD. P values are for time-by-treatment interaction.  
41  
42  
43  
44  
45  
46  
47  
48  
49  
50  
51  
52  
53  
54  
55  
56  
57  
58  
59  
60

1  
2  
3  
4  
5  
6  
7  
8  
9  
10  
11  
12  
13  
14  
15  
16  
17  
18  
19  
20  
21  
22  
23  
24  
25  
26  
27  
28  
29  
30  
31  
32  
33  
34  
35  
36  
37  
38  
39  
40  
41  
42  
43  
44  
45  
46  
47  
48  
49  
50  
51  
52  
53  
54  
55  
56  
57  
58  
59  
60

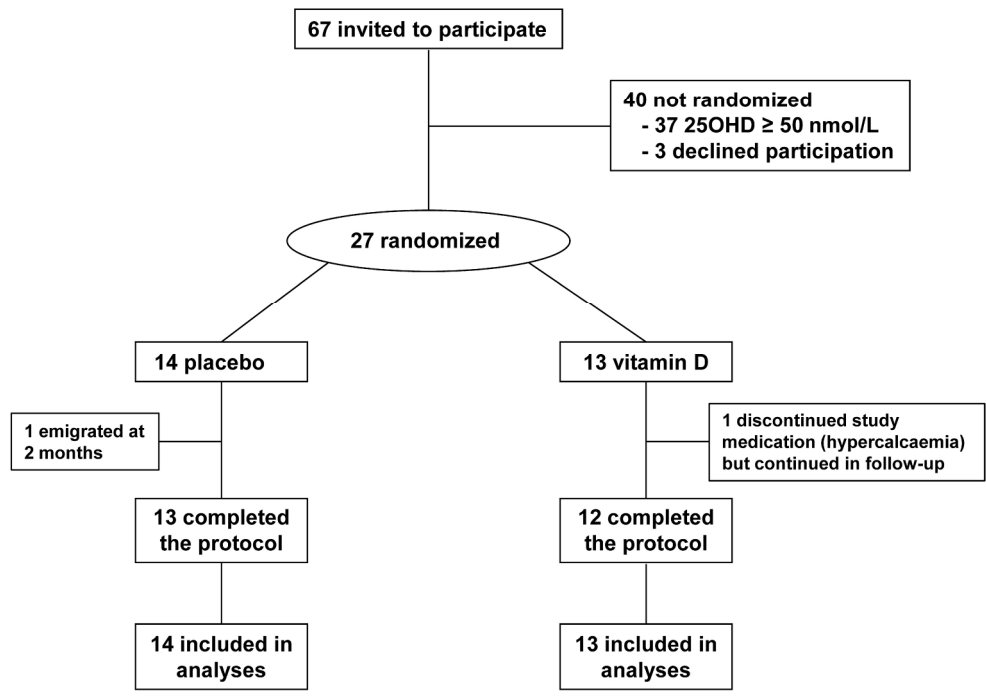

Figure 1: flow of participants  
106x76mm (600 x 600 DPI)

View only

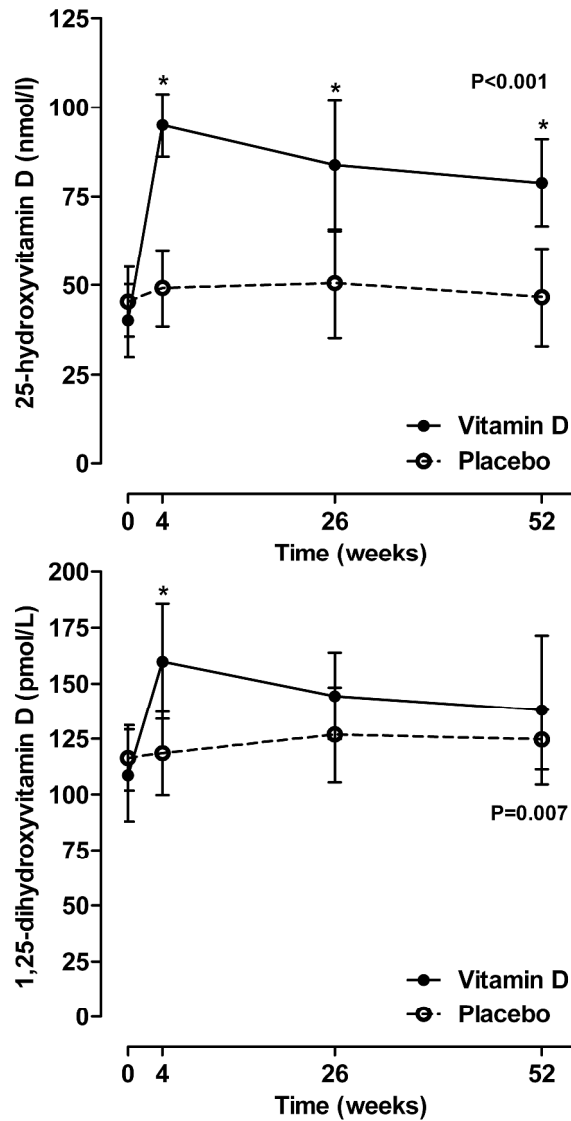

Figure 2: The effect of vitamin D supplementation on 25-hydroxyvitamin D and 1,25-dihydroxyvitamin D levels. Data are mean and 95% confidence interval. P values are for time-by-treatment interaction. Asterisks indicate significant between-groups differences at individual points.  
172x296mm (600 x 600 DPI)

1  
2  
3  
4  
5  
6  
7  
8  
9  
10  
11  
12  
13  
14  
15  
16  
17  
18  
19  
20  
21  
22  
23  
24  
25  
26  
27  
28  
29  
30  
31  
32  
33  
34  
35  
36  
37  
38  
39  
40  
41  
42  
43  
44  
45  
46  
47  
48  
49  
50  
51  
52  
53  
54  
55  
56  
57  
58  
59  
60

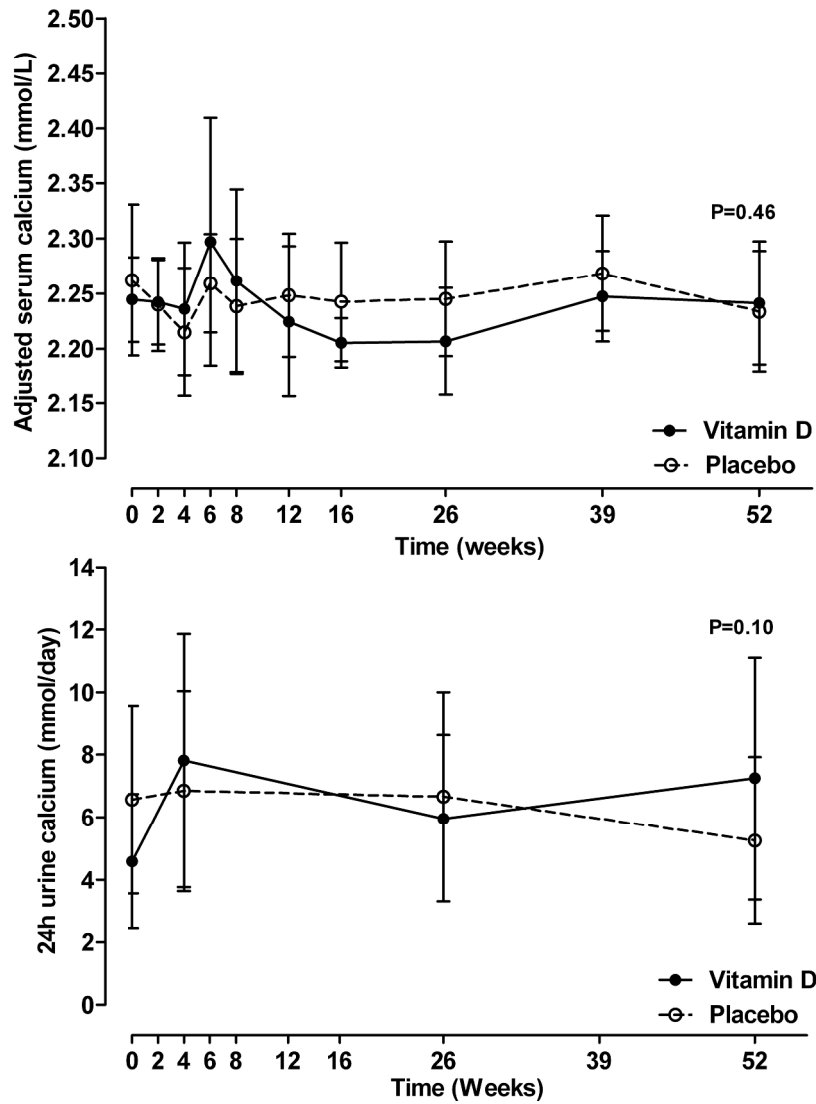

Figure 3: The effect of vitamin D supplementation on albumin-adjusted serum calcium and 24h urine calcium levels. Data are mean and 95% confidence interval. P values are for time-by-treatment interaction. 139x175mm (600 x 600 DPI)

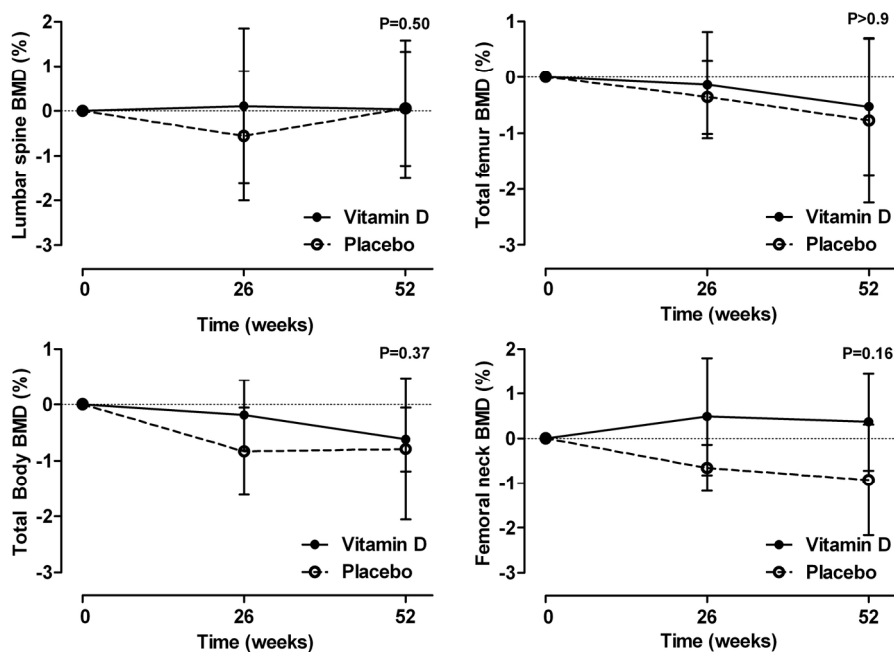

Figure 5: The effect of vitamin D supplementation on bone mineral density (BMD). Data are mean and 95% confidence interval for the percentage change from baseline adjusted for baseline BMD. P values are for time-by-treatment interaction.  
86x62mm (600 x 600 DPI)

**Title:** Randomized controlled trial of vitamin D supplementation in sarcoidosis.

**Running title:** Vitamin D supplementation and sarcoidosis

**Authors:**

Mark J Bolland, MBChB, PhD,<sup>1</sup>  
Margaret L Wilsher, MD,<sup>1,2</sup>  
Andrew Grey, MD,<sup>1</sup>  
Anne M Horne, MBChB,<sup>1</sup>  
Sheryl Fenwick, BAppSc<sup>1</sup>  
Greg D Gamble, MSc<sup>1</sup>  
Ian R Reid, MD,<sup>1</sup>

**Affiliation:**

<sup>1</sup>Department of Medicine, University of Auckland, Private Bag 92 019, Auckland 1142, New Zealand; <sup>2</sup> Green Lane Respiratory Services, Auckland District Health Board, Private Bag 92024, Auckland 1142, New Zealand

**Address for correspondence/reprints:**

Mark Bolland  
Bone and Joint Research Group,  
Department of Medicine, University of Auckland  
Private Bag 92 019, Auckland 1142, New Zealand  
Email: [m.bolland@auckland.ac.nz](mailto:m.bolland@auckland.ac.nz)  
Ph 64 9 373 7999  
Fax 64 9 373 7677

**Funding:**

This study was funded by the Health Research Council of New Zealand, and the Greenlane Research and Education Fund.

**Word counts:**

Text only: 2433  
Abstract: 275  
Figures: 5  
Tables: 2

**Disclosure:** All the authors state that they have no conflicts of interest.

**Key words:** vitamin D, hypercalcaemia, sarcoidosis, bone turnover, bone mineral density

**Trial registration:** This trial is registered at the Australian New Zealand Clinical Trials Registry ([www.anzctr.org.au](http://www.anzctr.org.au)). The registration number is ACTRN12607000364471, date of registration 5/7/2007.

**Article focus:**

- The effect of vitamin D supplementation on calcium homeostasis and skeletal health in sarcoidosis
- A randomized, placebo-controlled trial of vitamin D supplements in 27 normocalcaemic patients with sarcoidosis and 25-hydroxyvitamin D <50nmol/L

**Key messages:**

- Vitamin D supplementation had no effect on serum or urine calcium, bone turnover markers or bone mineral density over 12 months, but caused 1 case of significant hypercalcaemia.
- This clinical trial suggests that vitamin D supplements are not beneficial and may be harmful for patients with sarcoidosis and mildly low vitamin D levels.

**Limitations:**

- The study had limited power to detect small differences in bone density and bone turnover markers.
- Few participants had 25-hydroxyvitamin D levels < 25 nmol/L, and therefore the findings may not apply to individuals with very low vitamin D levels.

**Abstract****Objectives:**

The role vitamin D intake/production plays in sarcoidosis-associated hypercalcaemia is uncertain. However, authoritative reviews have recommended avoiding sunlight exposure and vitamin D supplements, which might lead to adverse skeletal outcomes from vitamin D insufficiency. We investigated the effects of vitamin D supplementation on surrogate measures of skeletal health in patients with sarcoidosis and vitamin D insufficiency.

**Design:**

Randomized, placebo-controlled trial

**Setting:** Clinical research centre

**Participants:** 27 normocalcaemic patients with sarcoidosis and 25-hydroxyvitamin D (25OHD) <50nmol/L.

**Intervention:** 50,000IU weekly cholecalciferol for 4 weeks, then 50,000IU monthly for 11 months) or placebo

**Primary and secondary outcome measures:** The primary endpoint was the change in serum calcium over 12 months, and secondary endpoints included measurements of calcitropic hormones, bone turnover markers, and bone mineral density (BMD).

**Results**



1  
2  
3 The mean age of participants was 57y and 70% were female. The mean (SD) screening  
4  
5 25OHD was 35(12) and 38(9) nmol/L in the treatment and control groups, respectively.  
6  
7 Vitamin D supplementation increased 25OHD to 94 nmol/L after 4 weeks, 84 nmol/L at 6  
8  
9 months, and 78 nmol/L at 12 months, while levels remained stable in the control group. 1,25  
10  
11 dihydroxyvitamin D levels were significantly different between the groups at 4 weeks, but not  
12  
13 at 6 or 12 months. There were no between-groups differences in albumin-adjusted serum  
14  
15 calcium, 24h urine calcium, markers of bone turnover, parathyroid hormone, or BMD over  
16  
17 the trial. One participant developed significant hypercalcaemia after 6 weeks (total  
18  
19 cholecalciferol dose 250,000IU).  
20  
21  
22  
23  
24

## 25 **Conclusions**

26  
27 In patients with sarcoidosis and 25OHD <50nmol/L, vitamin D supplements did not alter  
28  
29 average serum calcium or urine calcium, but had no benefit on surrogate markers of skeletal  
30  
31 health and caused one case of significant hypercalcaemia.  
32  
33  
34  
35

36 **Trial registration:** This trial is registered at the Australian New Zealand Clinical Trials  
37  
38 Registry ([www.anzctr.org.au](http://www.anzctr.org.au)). The registration number is ACTRN12607000364471, date of  
39  
40 registration 5/7/2007.  
41  
42  
43  
44  
45  
46  
47  
48  
49  
50  
51  
52  
53  
54  
55  
56  
57  
58  
59  
60

**Introduction:**

Hypercalcaemia occurs commonly in sarcoidosis, with an estimated prevalence of 4-11%. [1,2] Hypercalcaemia results from dysregulated production of 1,25-dihydroxyvitamin D (1,25OHD) by activated macrophages in granulomata. [3] Although the mechanism of hypercalcaemia is known, the role of vitamin D intake and production is less certain. On one hand, cases of hypercalcaemia and sarcoidosis precipitated by sunlight exposure or vitamin D supplements have been reported, [4-8] and there is seasonal variation in 1,25OHD levels [9] and the prevalence of hypercalcaemia. [7, 9, 10] These findings suggest that increases in 25-hydroxyvitamin D (25OHD) levels through sunlight exposure or vitamin D intake contribute to the hypercalcaemia. On the other hand, studies have reported no correlation between 25OHD, 1,25OHD, and serum calcium, [11] historical studies of treatment with very large doses of vitamin D (target 100,000 IU/d for 5-212 days) produced hypercalcaemia in only 4/24 patients, [12] and patients with sarcoidosis and glucocorticoid-induced osteoporosis commonly take vitamin D supplements without developing hypercalcaemia. [13] Furthermore, countries at higher latitudes do not have consistently lower prevalence of hypercalcaemia in sarcoidosis than countries closer to the equator, [1] and prevalence of hypercalcaemia in sarcoidosis is similar in countries with and without dietary vitamin D fortification. [6] These findings suggest that vitamin D intake and production are not the sole causes of hypercalcaemia in sarcoidosis.

Despite the conflicting evidence over the role of vitamin D intake/production in sarcoidosis-associated hypercalcaemia, several authoritative reviews have recommended avoidance of sunlight exposure and vitamin D supplements. [6-8] Adopting such recommendations is likely to lead to vitamin D insufficiency, which is associated with a number of adverse skeletal outcomes including secondary hyperparathyroidism, increased bone turnover, low bone

1  
2  
3 mineral density (BMD) and increased risk of fracture.[14] There is a high prevalence of low  
4  
5 BMD in cross-sectional studies of patients with sarcoidosis,[7 ,13 ,15-18] and glucocorticoid  
6  
7 use is common and well known to have adverse skeletal effects. Thus, it is possible that  
8  
9 treatment recommendations of sarcoidosis may worsen skeletal health by inadvertently  
10  
11 promoting vitamin D insufficiency.  
12  
13

14  
15  
16 There has been recent interest in the effects of vitamin D supplements in patients with  
17  
18 sarcoidosis.[19-22] We have carried out a randomized controlled trial to determine the effects  
19  
20 of vitamin D supplementation [on surrogate measures of skeletal health](#) in patients with  
21  
22 sarcoidosis and vitamin D insufficiency.  
23  
24  
25  
26

## 27 **Methods:**

### 28 Participants:

29  
30  
31 Patients with sarcoidosis attending the interstitial lung disease clinic at our hospital were invited  
32  
33 to participate. Newspaper advertisements were also placed. Potential participants were eligible if  
34  
35 they had sarcoidosis diagnosed by biopsy and/or typical pattern on high resolution computed  
36  
37 tomography and screening 25OHD <50 nmol/L, but were excluded if they had serum creatinine  
38  
39 >150 umol/L, nephrocalcinosis, albumin-adjusted serum calcium >2.55 mmol/L, concurrent  
40  
41 major systemic illness, or BMD T score <-2.5 at the spine or hip. Participants were recruited  
42  
43 between September 2007 and December 2010. The flow of participants is shown in Figure 1.  
44  
45  
46  
47  
48

### 49 Protocol

50  
51  
52 Participants were randomized to receive either 50,000 IU of cholecalciferol or placebo weekly  
53  
54 for four weeks followed by 50,000 IU cholecalciferol or placebo every month for 11 months.  
55  
56 Patients were asked to continue their usual diet to maintain their dietary calcium intake in  
57  
58  
59  
60

1  
2  
3 accordance with locally recommended practice. Calcium supplements were not administered.  
4  
5 Treatment allocations were randomized by the study statistician, using a variable block size  
6  
7 schedule, based on computer-generated random numbers. Study medication was dispensed into  
8  
9 identical bottles and labelled with participant numbers by a staff member not otherwise involved  
10  
11 in the study. To ensure masking, only the statistician and this staff member had access to  
12  
13 treatment allocation, and neither had contact with participants. All other study personnel and  
14  
15 participants were blinded to treatment allocation throughout. The study received ethical  
16  
17 approval from the Northern X regional ethics committee and the trial was registered with the  
18  
19 Australian New Zealand Clinical Trials Registry, ACTRN12607000364471. All participants  
20  
21 gave written, informed consent.  
22  
23  
24  
25

26  
27 The primary endpoint was the change in serum calcium over 12 months with vitamin D  
28  
29 supplementation. Secondary endpoints were the change in urine calcium, change in markers of  
30  
31 bone turnover, and change in BMD over 12 months. It was planned to recruit 40 participants, for  
32  
33 which the study had >80% power ( $\alpha = 0.05$ ) to detect a difference in serum calcium of 0.10  
34  
35 mmol/L between groups. Recruitment was stopped after more than 3y when 27 participants were  
36  
37 recruited.  
38  
39  
40  
41

#### 42 43 Measurements:

44  
45 At baseline, every 2 weeks for 8 weeks, then at 12, 16, 26, 39, and 52 weeks, fasting blood  
46  
47 and second-voided morning urine samples were collected. Samples for calcitropic hormones  
48  
49 and bone turnover markers were stored at  $-70^{\circ}\text{C}$  until they were batch-analyzed. At baseline,  
50  
51 4, 26, and 52 weeks, 24h urine samples were collected. The following assays were used: the  
52  
53 screening 25OHD was measured by radioimmunoassay (RIA) (DiaSorin, Stillwater, MN), but  
54  
55 all 25OHD samples from the study including the baseline sample were measured by liquid  
56  
57  
58  
59  
60

1  
2  
3 chromatography- tandem mass spectrometry (LC-MS/MS) (ABSciex API 4000); 1,25OHD  
4  
5 by RIA (IDS, Tyne and Wear, UK), serum parathyroid hormone (PTH) by  
6  
7 electrochemiluminescence immunoassay (E170, Roche Diagnostics, Indianapolis, IN); serum  
8  
9 procollagen type-I N-terminal propeptide (P1NP) and serum  $\beta$ -C-terminal telopeptide of type I  
10  
11 collagen (CTX) by the Roche Elecsys 2010 platform (Roche Diagnostics, Indianapolis, IN).  
12  
13  
14 BMD was measured every 6 months at the lumbar spine, proximal femur and total body using a  
15  
16 GE Prodigy dual-energy x-ray absorptiometer (DXA) (GE Lunar, Madison WI). Daily calcium  
17  
18 intake was assessed at baseline using a validated questionnaire.[23]  
19  
20

### 21 22 23 Statistics:

24  
25 Baseline differences between groups for continuous variables were assessed using Student's t-  
26  
27 test, and for categorical variables using the Chi-Square test. All analyses were carried out on an  
28  
29 intention-to-treat basis. A mixed models approach to repeated measures **with an unstructured**  
30  
31 **covariance structure** was used to examine the time course of response in the treatment and  
32  
33 control arms for serum calcium, urine calcium, calcitropic hormones, bone turnover markers and  
34  
35 BMD measurements by fitting main and treatment-by-time interaction effects. Post-hoc  
36  
37 comparisons between groups at individual time points were explored using the method of Tukey.  
38  
39 BMD data were analyzed using raw data, although results are presented as percentage change  
40  
41 from baseline adjusted for baseline between-groups differences, for ease of interpretation. All  
42  
43 tests were two-tailed and **hypothesis tests were deemed significant for**  $P < 0.05$ . All statistical  
44  
45 analyses were carried out using the SAS software package (SAS Institute, Cary, NC version 9.2)  
46  
47  
48  
49  
50

### 51 52 **Results:**

53  
54 The baseline characteristics of the two groups were similar (Table 1). The mean (range) 25OHD  
55  
56 at the study screening visit was 35 (14-48) nmol/L in the treatment group, and 38 (12-49)  
57  
58  
59  
60

1  
2  
3 nmol/L in the controls. The baseline 25OHD measurements from the first study visit (average 3  
4 weeks after screening 25OHD) that were stored and then measured at the end of the study using  
5 a different assay were slightly higher than the screening 25OHD in both groups (Table 1).  
6  
7

8  
9 Vitamin D supplementation led to an immediate increase in 25OHD levels, and a sustained  
10 difference between the groups that persisted throughout the trial ( $P < 0.001$ ) (Figure 2). There was  
11 also an immediate increase in 1,25OHD levels in response to vitamin D supplementation, but  
12 this did not persist. While the between-groups differences over the trial were statistically  
13 significant ( $P = 0.007$ ), by the end of the trial 1,25OHD levels were similar in both groups (Figure  
14  
15  
16  
17  
18  
19  
20  
21  
22  
23  
24  
25  
26  
27  
28  
29  
30  
31  
32  
33  
34  
35  
36  
37  
38  
39  
40  
41  
42  
43  
44  
45  
46  
47  
48  
49  
50  
51  
52  
53  
54  
55  
56  
57  
58  
59  
60

Figure 3 shows that vitamin D supplements had no effect on either average albumin-adjusted serum calcium ( $P = 0.46$ ) or 24h urine calcium levels ( $P = 0.10$ ) throughout the trial. There were no between-group differences at any time point in participants with 24h urine calcium  $> 10$  mmol/day (baseline vitamin D vs control- 1 vs. 4; 4 weeks- 4 vs. 4; 16 weeks 1 vs. 2; 52 weeks – 3 vs. 2). One participant in the vitamin D group and none in the control group had sustained hypercalcaemia with 24h urine calcium  $> 10$  mmol/day in all 3 visits during follow-up. One participant developed hypercalcaemia during the trial- a 51y old female, diagnosed with sarcoidosis 2y prior to study entry, with bilateral hilar lymphadenopathy, liver, and lung involvement. She was taking inhaled glucocorticoids at study entry but no other medication. She was assigned to vitamin D treatment and Table 2 shows that hypercalcaemia was recognized at 6 weeks, by which time she had taken five 50,000 IU doses of cholecalciferol. She was vitamin D deficient at baseline, and treatment increased her 25OHD level to 69 nmol/L. There was a marked increase in 1,25OHD, 24h urine calcium, serum phosphate, and creatinine levels and suppression of PTH levels following vitamin D supplementation, but she remained asymptomatic throughout. No further study medication was taken and the biochemical

1  
2  
3 abnormalities resolved without specific treatment by week 16 of the trial. When this participant  
4  
5 was excluded from the analyses for serum calcium and 24h urine calcium, the results did not  
6  
7 change substantially except there was no visible rise in the average albumin-adjusted serum  
8  
9 calcium at 6 and 8 weeks in the vitamin D group (data not shown).  
10

11  
12  
13  
14 The effect of vitamin D supplements on bone turnover markers and PTH are shown in Figure 4  
15  
16 and on BMD in Figure 5. Vitamin D supplementation had no effect on any of these variables  
17  
18 ( $P>0.16$  for all variables).  
19

20  
21  
22  
23 Other than the 1 participant treated with vitamin D who developed hypercalcaemia (proportion  
24  
25 8%, 95% confidence interval 1-33%), there were no other adverse events potentially related to  
26  
27 treatment during the trial. 1 participant (randomized to vitamin D) required prolonged treatment  
28  
29 with oral glucocorticoids, and 1 participant (randomized to placebo) received a single infusion of  
30  
31 zoledronic acid at 11 months, because of an underlying neurological disorder that had led to an  
32  
33 increased risk of falls and fracture.  
34  
35  
36  
37

### 38 **Discussion:**

39  
40 Vitamin D supplementation of patients with sarcoidosis and vitamin D insufficiency did not alter  
41  
42 average serum calcium or urine calcium levels, but also did not affect BMD or markers of bone  
43  
44 turnover, and caused one case of significant hypercalcaemia. 25OHD levels were in a range  
45  
46 many experts consider sub-optimal at baseline (average  $<50$  nmol/L) and vitamin D  
47  
48 supplementation led to average 25OHD levels of  $>75$  nmol/L throughout the trial, levels  
49  
50 generally considered to indicate adequate vitamin D status. Thus, our findings of an absence of  
51  
52 benefit from vitamin D supplements, together with infrequent but significant hypercalcaemia,  
53  
54  
55  
56  
57  
58  
59  
60

1  
2  
3 suggest that there is little indication for vitamin D supplements in patients with sarcoidosis and  
4  
5 vitamin D insufficiency.  
6  
7

8  
9  
10 Recent research has linked low 25OHD levels with numerous adverse non-skeletal  
11  
12 outcomes.[24] This information, when added to the existing data linking low 25OHD levels with  
13  
14 adverse skeletal outcomes,[14] has lead to renewed interest in the role of vitamin D in health. In  
15  
16 clinical practice, there has been a large increase in measurement of 25OHD[25 ,26] and calls for  
17  
18 widespread vitamin D supplementation.[27] However, these associations between low vitamin D  
19  
20 status and adverse health outcomes have been generated from observational studies which  
21  
22 cannot determine causality. There are now a growing number of randomized controlled trials  
23  
24 that have not shown benefits from vitamin D supplements on a wide range of endpoints. Thus,  
25  
26 meta-analyses of such trials have shown no benefit of vitamin D supplementation (when used  
27  
28 without co-administered calcium supplements) on falls,[28] fractures,[29] mortality,[30]  
29  
30 cardiovascular events,[30] and cancer.[31] In our study, which was powered to assess serum  
31  
32 calcium rather than BMD effects, we did not find evidence for benefit of vitamin D supplements  
33  
34 on surrogate markers of skeletal health in a group of patients with sarcoidosis who had mildly  
35  
36 low 25OHD levels, consistent with these findings.  
37  
38  
39  
40  
41  
42

43 The mechanism of hypercalcaemia in sarcoidosis is well described. Extra-renal production of  
44  
45 1,25OHD in activated macrophages in granulomata leads to increased intestinal calcium  
46  
47 absorption and increased bone resorption which collectively produce hypercalcaemia.[3] It is  
48  
49 unclear whether circulating 25OHD levels are implicated in causing hypercalcaemia, with some  
50  
51 evidence supporting [4-10] and some not supporting [1 ,6 ,11-13] each viewpoint, as discussed  
52  
53 earlier. Our study tends to support the former view for two reasons: firstly, one patient developed  
54  
55 significant hypercalcaemia within a short time of starting vitamin D supplements, and there was  
56  
57  
58  
59  
60



1  
2  
3 prompt resolution of the hypercalcaemia without other treatment after the supplements were  
4 stopped. Secondly, in the entire cohort there was a rapid increase in 1,25OHD with vitamin D  
5 supplements, although the increase did not persist. Both pieces of data suggest that abrupt  
6 changes in 25OHD can increase 1,25OHD, and in a minority of patients this can cause  
7 hypercalcaemia. The characteristics that predispose to the development of hypercalcaemia  
8 remain unclear. It is possible that increasing 25OHD more slowly using small, incrementally  
9 increasing doses of vitamin D, may avoid this complication, but this would need to be tested in  
10 closely monitored clinical trials.  
11  
12  
13  
14  
15  
16  
17  
18  
19

20  
21  
22 Our study has several limitations. It is a small study and therefore may be at risk of Type II error.  
23 We carried out simulations to explore what effect sizes could have been statistically significant  
24 in this study. We simulated an increased effect size in the treatment group (without varying data  
25 in the placebo group or the sample size) in the models used in the study analyses. A difference  
26 between the groups at 1y of 0.06 mmol/L in serum calcium, the primary endpoint, would have  
27 reached conventional statistical significance. This is 60% of the value used in the study power  
28 calculation (0.1 mmol/L) that we considered to be clinically relevant when designing the study.  
29 Similarly, the corresponding between-groups differences that would have reached statistical  
30 significance for the other main endpoints were: 2.4 pmol/L for PTH, 7 µg/L for P1NP, 140 ng/L  
31 for CTX, and 0.5% - 1.9% for BMD, depending on site. Differences below these amounts would  
32 be of questionable clinical relevance. Thus, while small, the study did have more than adequate  
33 power to detect clinically relevant differences. A second limitation is regarding the screening  
34 vitamin D measurement. All participants had 25OHD <50 nmol/L at the screening visit  
35 measured using a Diasorin RIA. All study samples for 25OHD were frozen and then assayed in  
36 a single batch at another laboratory using an LC-MS/MS assay. The 25OHD levels measured  
37 using LC-MS/MS were on average slightly higher than those measured using the Diasorin  
38  
39  
40  
41  
42  
43  
44  
45  
46  
47  
48  
49  
50  
51  
52  
53  
54  
55  
56  
57  
58  
59  
60

1  
2  
3 immunoassay, and 9/27 participants had 25OHD > 50 nmol/L at the baseline visit. Variation  
4  
5 between results from different 25OHD assays is well-described, and while LC-MS/MS is  
6  
7 usually considered the gold standard, both immunoassays and LC-MS/MS have limitations.[32]  
8  
9 Few participants had 25OHD < 25 nmol at baseline, thus our results may not apply to  
10  
11 individuals with very low 25OHD levels.  
12  
13

14  
15  
16 In summary, we did not find evidence of benefits on surrogate markers of skeletal health from  
17  
18 vitamin D supplementation in patients with sarcoidosis and vitamin D insufficiency. However,  
19  
20 there was evidence of harm with one case of significant hypercalcaemia. The absence of benefit  
21  
22 together with the risk of infrequent but significant adverse effects suggests that there is little  
23  
24 indication for vitamin D supplements in patients with sarcoidosis and vitamin D levels in the  
25  
26 range in this study (12 – 49 nmol/L).  
27  
28  
29  
30  
31  
32  
33  
34  
35  
36  
37  
38  
39  
40  
41  
42  
43  
44  
45  
46  
47  
48  
49  
50  
51  
52  
53  
54  
55  
56  
57  
58  
59  
60

**Funding:**

This study was funded by the Health Research Council of New Zealand, and the Greenlane Research and Education Fund. The sponsors of the study had no role in design and conduct of the study; collection, management, analysis, and interpretation of the data; and preparation, review, or approval of the manuscript.

**Disclosure:** All the authors state that they have no conflicts of interest.

**Contributorship:**

MB, AG, AH, IR, and MW designed the study. SF and AH ran the study. MB and GG carried out the statistical analyses. MB drafted the article. All authors critically reviewed the draft manuscript and approved the final version. MB is the guarantor of the article.

**Data sharing:**

There are no additional data available.

## References

1. James DG, Neville E, Siltzbach LE. A worldwide review of sarcoidosis. *Ann N Y Acad Sci* 1976;**278**:321-34.
2. Baughman RP, Teirstein AS, Judson MA, Rossman MD, Yeager H, Jr., Bresnitz EA, et al. Clinical characteristics of patients in a case control study of sarcoidosis. *Am J Respir Crit Care Med* 2001;**164**:1885-9.
3. Singer FR, Adams JS. Abnormal calcium homeostasis in sarcoidosis. *N Engl J Med* 1986;**315**:755-7.
4. Bell NH, Gill JR, Jr., Bartter FC. On the Abnormal Calcium Absorption in Sarcoidosis. Evidence for Increased Sensitivity to Vitamin D. *Am J Med* 1964;**36**:500-13.
5. Sandler LM, Winearls CG, Fraher LJ, Clemens TL, Smith R, O'Riordan JL. Studies of the hypercalcaemia of sarcoidosis: effect of steroids and exogenous vitamin D3 on the circulating concentrations of 1,25-dihydroxy vitamin D3. *Q J Med* 1984;**53**:165-80.
6. Sharma OP. Vitamin D, calcium, and sarcoidosis. *Chest* 1996;**109**:535-9.
7. Rizzato G. Clinical impact of bone and calcium metabolism changes in sarcoidosis. *Thorax* 1998;**53**:425-9.
8. Conron M, Young C, Beynon HL. Calcium metabolism in sarcoidosis and its clinical implications. *Rheumatology (Oxford)* 2000;**39**:707-13.
9. Bonnema SJ, Moller J, Marving J, Kvetny J. Sarcoidosis causes abnormal seasonal variation in 1,25-dihydroxy-cholecalciferol. *J Intern Med* 1996;**239**:393-8.
10. Taylor RL, Lynch HJ, Jr., Wysor WG, Jr. Seasonal influence of sunlight on the hypercalcemia of sarcoidosis. *Am J Med* 1963;**34**:221-7.

- 1  
2  
3 11. Alberts C, van den Berg H. Calcium metabolism in sarcoidosis. A follow-up study  
4 with respect to parathyroid hormone and vitamin D metabolites. *Eur J Respir Dis*  
5 1986;**68**:186-94.  
6  
7
- 8  
9 12. Larsson LG, Liljestrand A, Wahlund H. Treatment of sarcoidosis with calciferol. *Acta*  
10 *Med Scand* 1952;**143**:281-87.  
11
- 12 13. Adler RA, Funkhouser HL, Petkov VI, Berger MM. Glucocorticoid-induced  
13 osteoporosis in patients with sarcoidosis. *Am J Med Sci* 2003;**325**:1-6.  
14  
15
- 16 14. Lips P. Vitamin D deficiency and secondary hyperparathyroidism in the elderly:  
17 consequences for bone loss and fractures and therapeutic implications. *Endocr Rev*  
18 2001;**22**:477-501.  
19  
20
- 21 15. Montemurro L, Fraioli P, Rizzato G. Bone loss in untreated longstanding sarcoidosis.  
22 *Sarcoidosis* 1991;**8**:29-34.  
23  
24
- 25 16. Rottoli P, Gonnelli S, Silitro S, Zacchei F, Fabbrini D, Gennari C, et al. Alterations in  
26 calcium metabolism and bone mineral density in relation to the activity of sarcoidosis.  
27 *Sarcoidosis* 1993;**10**:161-2.  
28  
29
- 30 17. Hamada K, Nagai S, Tsutsumi T, Izumi T. Bone mineral density and vitamin D in  
31 patients with sarcoidosis. *Sarcoidosis Vasc Diffuse Lung Dis* 1999;**16**:219-23.  
32  
33
- 34 18. Sipahi S, Tuzun S, Ozaras R, Calis HT, Ozaras N, Tuzun F, et al. Bone mineral  
35 density in women with sarcoidosis. *J Bone Miner Metab* 2004;**22**:48-52.  
36  
37
- 38 19. Burke RR, Rybicki BA, Rao DS. Calcium and vitamin D in sarcoidosis: how to assess  
39 and manage. *Semin Respir Crit Care Med* 2010;**31**:474-84.  
40  
41
- 42 20. Sharma OP. Vitamin D and sarcoidosis. *Curr Opin Pulm Med* 2010;**16**:487-8.  
43  
44
- 45 21. Sage RJ, Rao DS, Burke RR, Lim HW. Preventing vitamin D toxicity in patients with  
46 sarcoidosis. *J Am Acad Dermatol* 2011;**64**:795-6.  
47  
48  
49  
50  
51  
52  
53  
54  
55  
56  
57

- 1
- 2
- 3 22. Sweiss NJ, Lower EE, Korsten P, Niewold TB, Favus MJ, Baughman RP. Bone health
- 4 issues in sarcoidosis. *Curr Rheumatol Rep* 2011;**13**:265-72.
- 5
- 6
- 7 23. Angus RM, Sambrook PN, Pocock NA, Eisman JA. A simple method for assessing
- 8 calcium intake in Caucasian women. *J Am Diet Assoc* 1989;**89**:209-14.
- 9
- 10
- 11 24. Holick MF. Vitamin D deficiency. *N Engl J Med* 2007;**357**:266-81.
- 12
- 13
- 14 25. Sattar N, Welsh P, Panarelli M, Forouhi NG. Increasing requests for vitamin D
- 15 measurement: costly, confusing, and without credibility. *Lancet* 2012;**379**:95-6.
- 16
- 17
- 18 26. Bolland MJ, Grey A, Davidson JS, Cundy T, Reid IR. Should measurement of vitamin
- 19 D and treatment of vitamin D insufficiency be routine in New Zealand? *N Z Med J*
- 20 2012;**125**:83-91.
- 21
- 22
- 23 27. Pearce SH, Cheetham TD. Diagnosis and management of vitamin D deficiency. *BMJ*
- 24 2010;**340**:b5664.
- 25
- 26
- 27
- 28 28. Murad MH, Elamin KB, Abu Elnour NO, Elamin MB, Alkatib AA, Fatourechi MM,
- 29 et al. Clinical review: The effect of vitamin D on falls: a systematic review and meta-
- 30 analysis. *J Clin Endocrinol Metab* 2011;**96**:2997-3006.
- 31
- 32
- 33 29. Avenell A, Gillespie WJ, Gillespie LD, O'Connell D. Vitamin D and vitamin D
- 34 analogues for preventing fractures associated with involutional and post-menopausal
- 35 osteoporosis. *Cochrane Database Syst Rev* 2009:CD000227.
- 36
- 37
- 38 30. Elamin MB, Abu Elnour NO, Elamin KB, Fatourechi MM, Alkatib AA, Almandoz
- 39 JP, et al. Vitamin D and cardiovascular outcomes: a systematic review and meta-
- 40 analysis. *J Clin Endocrinol Metab* 2011;**96**:1931-42.
- 41
- 42
- 43 31. Chung M, Lee J, Terasawa T, Lau J, Trikalinos TA. Vitamin D With or Without
- 44 Calcium Supplementation for Prevention of Cancer and Fractures: An Updated Meta-
- 45 analysis for the U.S. Preventive Services Task Force. *Ann Intern Med* 2011;**155**:827-
- 46 38.
- 47
- 48
- 49
- 50
- 51
- 52
- 53
- 54
- 55
- 56
- 57
- 58
- 59
- 60

- 1  
2  
3 32. Carter GD. 25-Hydroxyvitamin D assays: the quest for accuracy. Clin Chem  
4  
5 2009;**55**:1300-2.  
6  
7  
8  
9  
10  
11  
12  
13  
14  
15  
16  
17  
18  
19  
20  
21  
22  
23  
24  
25  
26  
27  
28  
29  
30  
31  
32  
33  
34  
35  
36  
37  
38  
39  
40  
41  
42  
43  
44  
45  
46  
47  
48  
49  
50  
51  
52  
53  
54  
55  
56  
57  
58  
59  
60

For peer review only

Table 1: Baseline characteristics

|                                    | Vitamin D<br>n=13 | Placebo<br>n=14 |
|------------------------------------|-------------------|-----------------|
| Age (y)                            | 56 (10)           | 57 (9)          |
| Female                             | 10 (77)           | 9 (64)          |
| Ethnicity                          |                   |                 |
| European                           | 10 (77)           | 9 (64)          |
| Indian                             | 1 (8)             | 3 (21)          |
| Other                              | 1 (8)             | 2 (14)          |
| Weight (kg)                        | 75 (19)           | 72 (13)         |
| Dietary calcium intake (mg/d)      | 730 (670)         | 660 (330)       |
| Smoking status                     |                   |                 |
| Current                            | 3 (23)            | 0 (0)           |
| Never Smoked                       | 8 (63)            | 9 (64)          |
| Glucorticoid use                   |                   |                 |
| Past oral use                      | 7 (54)            | 9 (64)          |
| Current oral use                   | 1 (8)             | 0 (0)           |
| Current inhaled use                | 6 (46)            | 1 (7)           |
| Sarcoidosis extent                 |                   |                 |
| Pulmonary involvement              | 11 (85)           | 8 (57)          |
| Extra-pulmonary involvement        | 6 (46)            | 7 (50)          |
| Chest radiograph stage at baseline |                   |                 |
| Stage 0                            | 1 (10)            | 6 (46)          |
| Stage 1                            | 1 (10)            | 1 (8)           |
| Stage 2                            | 1 (10)            | 0 (0)           |
| Stage 3                            | 3 (30)            | 4 (31)          |
| Stage 4                            | 4 (40)            | 2 (15)          |
| Bone density (g/cm <sup>2</sup> )  |                   |                 |
| Lumbar spine                       | 1.16 (0.19)       | 1.13 (0.11)     |
| T score                            | -0.2 (1.6)        | -0.6 (0.9)      |
| Total hip                          | 0.95 (0.11)       | 0.93 (0.11)     |
| T score                            | -0.6 (0.9)        | -0.8 (0.9)      |
| Femoral neck                       | 0.89 (0.13)       | 0.91 (0.09)     |
| T score                            | -1.2 (1.0)        | -0.9 (0.7)      |
| Total body                         | 1.15 (0.10)       | 1.11 (0.07)     |
| Adjusted serum calcium (mmol/L)    | 2.24 (0.06)       | 2.26 (0.12)     |
| Serum phosphate (mmol/L)           | 1.23 (0.15)       | 1.06 (0.17)     |
| Serum creatinine (mmol/L)          | 74 (14)           | 77 (12)         |
| 24 hr urine calcium (mmol/d)       | 4.6 (3.4)         | 6.6 (5.2)       |



|                                                   |           |           |
|---------------------------------------------------|-----------|-----------|
| Screening 25 hydroxyvitamin D (nmol) <sup>a</sup> | 35 (12)   | 38 (9)    |
| Baseline 25 hydroxyvitamin D (nmol) <sup>a</sup>  | 40 (17)   | 45 (17)   |
| 1,25 dihydroxyvitamin D (pmol/L)                  | 109 (34)  | 116 (25)  |
| Parathyroid hormone (pmol/L)                      | 4.0 (1.6) | 4.9 (2.0) |
| P1NP (ug/L)                                       | 37 (12)   | 40 (15)   |
| β-CTX (ng/L)                                      | 310 (130) | 360 (210) |

<sup>a</sup> 25-hydroxyvitamin D were measured at the screening study visit using a Diasorin assay, while the baseline 25-hydroxyvitamin D at the first study visit (average 3 weeks later) were stored frozen until the end of the study and then measured with a liquid chromatography tandem mass spectrometry assay (see text). Data are mean (SD) or n (%). Abbreviations: P1NP- serum procollagen type-I N-terminal propeptide; β-CTX - serum β-C-terminal telopeptide of type I collagen.

Table 2: Time course of hypercalcaemia in patient randomized to vitamin D supplements

| Week <sup>a</sup> | Dietary calcium (mg/d) | Serum calcium <sup>b</sup> (mmol/L) | Serum phosphate (mmol/L) | Serum creatinine (μmol/L) | 24h urine calcium (mmol/d) | 25OHD (nmol/L) | 1,25OHD (pmol/L) | PTH (pmol/L) |
|-------------------|------------------------|-------------------------------------|--------------------------|---------------------------|----------------------------|----------------|------------------|--------------|
| 0                 | 460                    | 2.26                                | 1.24                     | 76                        | 4.2                        | 18             | 77               | 2.3          |
| 2                 |                        | 2.36                                | 1.28                     | 74                        |                            |                |                  |              |
| 4                 |                        | 2.48                                | 1.57                     | 83                        | 14.4                       | 69             | 218              | 0.9          |
| 6                 |                        | 2.88                                | 1.55                     | 112                       |                            |                |                  |              |
| 7                 |                        | 2.87                                | 1.31                     | 125                       |                            |                |                  |              |
| 8                 |                        | 2.65                                | 1.45                     | 124                       |                            |                |                  |              |
| 12                |                        | 2.46                                | 1.23                     | 93                        |                            |                |                  |              |
| 16                |                        | 2.22                                | 1.14                     | 75                        |                            |                |                  |              |
| 26                |                        | 2.28                                | 1.04                     | 71                        |                            | 31             | 81               | 2.2          |
| 52                |                        | 2.27                                | 1.11                     | 78                        | 6.7                        | 41             | 77               | 2.1          |

<sup>a</sup> study treatment was stopped at 6 weeks when hypercalcaemia was recognised. The last dose was taken at week 5, and five 50,000 IU doses of cholecalciferol were taken over 5 weeks.

<sup>b</sup> albumin-adjusted serum calcium.

Abbreviations : 25OHD 25-hydroxyvitamin D, 1,25OHD 1,25-dihydroxyvitamin D, PTH-parathyroid hormone.

1  
2  
3 Figure 1: flow of participants  
4  
5  
6

7 Figure 2: The effect of vitamin D supplementation on 25-hydroxyvitamin D and 1,25-  
8 dihydroxyvitamin D levels. Data are mean and 95% confidence interval. P values are for  
9 time-by-treatment interaction. Asterisks indicate significant between-groups differences at  
10 individual points.  
11  
12  
13  
14  
15  
16  
17

18 Figure 3: The effect of vitamin D supplementation on albumin-adjusted serum calcium and  
19 24h urine calcium levels. Data are mean and 95% confidence interval. P values are for time-  
20 by-treatment interaction.  
21  
22  
23  
24  
25  
26

27 Figure 4: The effect of vitamin D supplementation on bone turnover markers and serum  
28 parathyroid (PTH). Data are mean and 95% confidence interval. P values are for time-by-  
29 treatment interaction. Abbreviations: Procollagen type-I N-terminal propeptide: P1NP;  $\beta$ -C-  
30 terminal telopeptide of type I collagen:  $\beta$ -CTx  
31  
32  
33  
34  
35  
36  
37

38 Figure 5: The effect of vitamin D supplementation on bone mineral density (BMD). Data are  
39 mean and 95% confidence interval for the percentage change from baseline adjusted for  
40 baseline BMD. P values are for time-by-treatment interaction.  
41  
42  
43  
44  
45  
46  
47  
48  
49  
50  
51  
52  
53  
54  
55  
56  
57  
58  
59  
60

1  
2  
3  
4  
5  
6  
7  
8  
9  
10  
11  
12  
13  
14  
15  
16  
17  
18  
19  
20  
21  
22  
23  
24  
25  
26  
27  
28  
29  
30  
31  
32  
33  
34  
35  
36  
37  
38  
39  
40  
41  
42  
43  
44  
45  
46  
47  
48  
49  
50  
51  
52  
53  
54  
55  
56  
57  
58  
59  
60



Redundant version of Figure  
116x95mm (600 x 600 DPI)

For peer review only
